1 **Rapid Assessment of the Temporal Function and Phenotypic Reversibility of**  
2 **Neurodevelopmental Disorder Risk Genes in *C. elegans***

3  
4 **AUTHORS:**

5 Lexis D. Kepler<sup>1\*</sup>, Troy A. McDiarmid<sup>1,2\*</sup>, and Catharine H. Rankin<sup>1,3</sup>

6  
7 **AFFILIATIONS:**  
8

- 9 1. Djavad Mowafaghian Centre for Brain Health, University of British Columbia, 2211  
10 Wesbrook Mall, Vancouver, British Columbia, Canada, V6T 2B5
- 11 2. Department of Genome Sciences, University of Washington School of Medicine, Foegen  
12 Building S-250 3720 15th Ave NE, Seattle, Washington, United States of America
- 13 3. Department of Psychology, University of British Columbia, 2136 West Mall, Vancouver,  
14 British Columbia, Canada, V6T 1Z4

15 \* Authors contributed equally

16 **AUTHOR EMAILS:**

17 L.D. Kepler – [lexis.kepler@psych.ubc.ca](mailto:lexis.kepler@psych.ubc.ca), T.A. McDiarmid – [troy13@uw.edu](mailto:troy13@uw.edu), C.H. Rankin –  
18 [crankin@psych.ubc.ca](mailto:crankin@psych.ubc.ca)

19 **CORRESPONDING ADDRESS:**

20 Dr. Catharine Rankin

21 Djavad Mowafaghian Centre for Brain Health

22 University of British Columbia

23 2211 Wesbrook Mall

24 Vancouver, British Columbia, Canada, V6T 2B5

25

26

## 27 **SUMMARY STATEMENT**

28           We developed a strategy that combines a conditional and reversible protein degradation  
29 system with our high-throughput machine vision tracking system to assess the temporal windows  
30 of gene function and reversibility of phenotypic disruptions associated with neurodevelopmental  
31 disorder risk gene orthologs using *C. elegans*. Using this approach, we assessed 3 genes (*unc-*  
32 *3*, *unc-86*, and *dhc-1*) and found that post-embryonic rescue was possible for each gene and each  
33 phenotypic feature class assessed. Re-activation of certain genes was able to reverse multiple  
34 phenotypic disruptions late into development without inducing novel phenotypes, prioritizing them  
35 for further study.

## 36 **ABSTRACT**

37           Hundreds of genes have been implicated in neurodevelopmental disorders. Previous  
38 studies have indicated that some phenotypes caused by decreased developmental function of  
39 select risk genes can be reversed by restoring gene function in adulthood. However, very few risk  
40 genes have been assessed for adult reversibility. We developed a strategy to rapidly assess the  
41 temporal requirements and phenotypic reversibility of neurodevelopmental disorder risk gene  
42 orthologs using a conditional protein degradation system and machine vision phenotypic profiling  
43 in *Caenorhabditis elegans*. Using this approach, we measured the effects of degrading and re-  
44 expressing orthologs of 3 neurodevelopmental risk genes *EBF3*, *BRN3A*, and *DYNC1H1* across  
45 30 morphological, locomotor, sensory, and learning phenotypes at multiple timepoints throughout  
46 development. We found some degree of phenotypic reversibility was possible for each gene  
47 studied. However, the temporal requirements of gene function and degree of phenotypic  
48 reversibility varied by gene and phenotype. The data reflects the dynamic nature of gene function  
49 and the importance of using multiple time windows of degradation and re-expression to  
50 understand the many roles a gene can play over developmental time. This work also

51 demonstrates a strategy of using a high-throughput model system to investigate temporal  
52 requirements of gene function across a large number of phenotypes to rapidly prioritize  
53 neurodevelopmental disorder genes for re-expression studies in other organisms.

54

55 **KEYWORDS**

56 Neurodevelopmental disorders, Phenotypic reversibility, Temporal windows of gene function,  
57 Auxin-Inducible Degradation, *Caenorhabditis elegans*, Habituation

58

59

60

61

62

63

64

65

66

67

68

69

70

71

72

73

74

75

76

## 77 INTRODUCTION

78 Neurodevelopmental disorders such as Autism Spectrum Disorder (ASD) and Intellectual  
79 Disability (ID) are highly genetically heterogeneous and are accompanied by a range of cognitive  
80 and behavioural phenotypes including sensory processing and learning impairments (American  
81 Psychiatric Association, 2013; Boyle et al., 2011; de la Torre-Ubieta et al., 2016; Iakoucheva et  
82 al., 2019; Sanders et al., 2019). More severe cases of these disorders can cause significant  
83 challenges for affected individuals and their families (Boyle et al., 2011; de la Torre-Ubieta et al.,  
84 2016; Iakoucheva et al., 2019; Sanders et al., 2019). Recently, there has been remarkable  
85 progress in identifying genetic risk factors that contribute to diverse neurodevelopmental  
86 disorders, with hundreds of genes now implicated in ASD and ID alone (de la Torre-Ubieta et al.,  
87 2016; De Rubeis et al., 2014; Deciphering Developmental Disorders Study, 2015; Iakoucheva et  
88 al., 2019; Iossifov et al., 2014; Sanders et al., 2019, 2015; Satterstrom et al., 2020; Vissers et al.,  
89 2016). Variants in the majority of these genes (e.g. 89/102 ASD-associated genes; 87%) are  
90 thought to confer risk through haploinsufficiency as the individual carries one loss-of-function  
91 allele with insufficient residual function from the remaining copy (Satterstrom et al., 2020). The  
92 identification of how these variants contribute to disorder pathology suggests re-expression  
93 therapies, where a second functional allele is introduced to restore protein levels to compensate  
94 for the decreased function of the faulty allele, could be a viable treatment option.

95  
96 Historically, it was assumed that any treatment targeting neurodevelopmental disorder risk  
97 genes would need to be administered very early in development to be effective. This long-held  
98 assumption was challenged by reports that re-expression of several risk gene orthologs could  
99 reverse multiple altered neurophysiological and/or behavioural phenotypes in adult mice (Creson  
100 et al., 2019; Ehninger et al., 2008; Gao et al., 2020; Guy et al., 2007; Mei et al., 2016; Vogel-  
101 Ciernia et al., 2013; Zeier et al., 2009). In addition, inactivating orthologs of some of these risk  
102 genes in adult mice could also induce the phenotypic impairments previously associated only with

103 altered gene function during development (Ehninger et al., 2008; Guy et al., 2007). Together,  
104 these findings suggest there may be a degree of temporal flexibility in the neurodevelopmental  
105 processes these gene contribute to, and that some genes typically associated with  
106 neurodevelopment may continue to have important functions well into adulthood.

107

108 The handful of reports that show the possibility of phenotypic reversibility with gene  
109 reactivation in adult mice offer critical insights into which genes are promising candidates for  
110 future re-expression-based therapies. However, because of limitations including cost,  
111 developmental rate, and technical difficulties (e.g. injection of viral vectors for large numbers of  
112 animals, etc.) very few risk genes have been tested for adult phenotypic reversibility. Further, the  
113 rapidly growing number of risk genes identified in recent years has exacerbated this problem and  
114 drastically increased the need for candidate prioritization to better direct research efforts. While  
115 most neurodevelopmental disorder risk genes are highly expressed early in pre-natal  
116 development (Jin et al., 2020; Parikshak et al., 2013; Satterstrom et al., 2020; Willsey et al., 2013),  
117 many continue to be expressed well into adulthood, and we currently do not know if the  
118 relationship between temporal expression patterns and inferred temporal functional windows are  
119 a significant predictor of whether a gene will be suitable for re-expression therapies. Assessing  
120 the phenotypic reversibility of neurodevelopmental disorder risk genes in more high-throughput  
121 model organisms offers the ability to rapidly screen a large number of genes to aid in prioritizing  
122 risk genes for further study in mammalian models.

123

124 The nematode *Caenorhabditis elegans* offers multiple advantages to systematically  
125 assess the temporal requirements and phenotypic reversibility of neurodevelopmental disorder  
126 risk genes. *C. elegans* have orthologs for a high number of neurodevelopmental risk genes (e.g.  
127 >80% of high-confidence ASD risk genes (McDiarmid et al., 2020)) and these genes have  
128 repeatedly been shown to be so well-conserved that in many cases expression of the human risk

129 gene can compensate for loss of the *C. elegans* ortholog (Kaletta and Hengartner, 2006; Levitan  
130 et al., 1996; McDiarmid et al., 2018; Post et al., 2020). *C. elegans* have rapid development,  
131 growing from egg through well-characterized larval stages (L1, L2, L3, and L4) to egg-laying  
132 adults within 3 days. The hermaphroditic reproduction of *C. elegans* enable large colonies of  
133 genetically identical animals to be rapidly and cheaply cultivated. In addition, multiple genomic  
134 tools are available to precisely control the spatial and/or temporal activity of genes *in vivo* (Ashley  
135 et al., 2021; Au et al., 2019; Dickinson and Goldstein, 2016; Nance and Frøkjær-Jensen, 2019;  
136 Wang et al., 2017; Zhang et al., 2015). Lastly, the phenotypic profiles of hundreds of animals can  
137 be simultaneously assessed using automated tracking systems which capture and analyze the  
138 impact of genetic perturbations on morphological, sensory, and learning behaviours in real time  
139 (Husson, Steuer Costa, Schmitt, and Gottschalk, 2012; McDiarmid et al., 2018; Swierczek et al.,  
140 2011).

141  
142 A behaviour that has been increasingly used in high-throughput model organisms to  
143 investigate the biological function of neurodevelopmental disorder risk genes and functional  
144 impact of disorder-associated variants is habituation (Kepler et al., 2020). Habituation is a highly  
145 conserved form of non-associative learning observed as a decrement in responding to a repetitive  
146 stimulus (Rankin et al., 2009; Thompson and Spencer, 1966). Habituation is thought to be an  
147 important building block for higher cognitive functions and enable ongoing shifts in behavioral  
148 strategy (McDiarmid et al., 2019; Schmid et al., 2015). Alterations in the ability to habituate have  
149 been reported in ASD, ID, and Schizophrenia (McDiarmid et al., 2017) and are hypothesized to  
150 contribute to more complex behavioural symptoms (Green et al., 2015; Kavšek, 2004; Kleinhans  
151 et al., 2009; Massa and O'Desky, 2012; Williams et al., 2013).

152  
153 Here, we developed a strategy to assess the phenotypic reversibility and temporal  
154 functional windows of three neurodevelopmental disorder risk genes *in vivo* using CRISPR-Cas9

155 Auxin Inducible degradation (AID) and high-throughput machine vision phenotyping (**Fig. 1**). We  
156 took advantage of the genetic tractability and rapid, stereotyped development of *C. elegans* to  
157 precisely investigate the effects of degrading and re-expressing the proteins of interest at multiple  
158 developmental time points in thousands of age-synchronized genetically identical animals. We  
159 found that some level of phenotypic reversibility was possible for each risk gene if re-expression  
160 occurred early in post-embryonic development, but only re-expressing *EBF3•unc-3* and  
161 *DYNC1H1•dhc-1* could reverse multiple phenotypic alterations later in life. More broadly, we  
162 provide an adaptable strategy and important examples/criteria that illustrate a path towards  
163 prioritizing neurodevelopmental disorder risk genes for further study and therapeutic  
164 development.

165

## 166 **RESULTS**

167 We selected three neurodevelopmental disorder risk genes (as identified by Simons  
168 Foundation Autism Research Initiative (Abrahams et al., 2013), Satterstorm et al. (2020), and/or  
169 literature search) for reversibility analysis based on the availability of *C. elegans* strains that  
170 contain a neurodevelopmental disorder risk gene ortholog tagged with the Auxin-Inducible Degron  
171 at the endogenous locus using CRISPR-Cas9 (see methods). The AID system relies on tagging  
172 the gene of interest with a short degron peptide tag as well as transgenic expression of *TIR1*  
173 which is an E3 ubiquitin ligase typically found only in plants (Nishimura et al., 2009; Zhang et al.,  
174 2015). In the presence of the plant hormone Auxin, *TIR1* can associate with the AID degron,  
175 adding a poly-ubiquitin chain to the protein of interest causing it to be degraded by the proteasome  
176 (Nishimura et al., 2009; Zhang et al., 2015) (**Fig. 1A**). We chose to use the AID system as it  
177 enables temporal control of protein degradation, which can be reversed by transferring  
178 populations of worms to culture plates without Auxin (McDiarmid et al., 2020; Zhang et al., 2015).  
179 Since the AID degron is tagged to the endogenous loci, protein expression is restored using the  
180 native regulatory machinery, therefore bypassing the biological confounds associated with

181 conventional approaches that rely on overexpression. Importantly, our lab and others have shown  
182 that Auxin exposure does not cause any overt effects on *C. elegans* morphology, locomotion,  
183 short-term learning, or mechanosensory processing phenotypes (McDiarmid et al., 2020; Zhang  
184 et al., 2015).

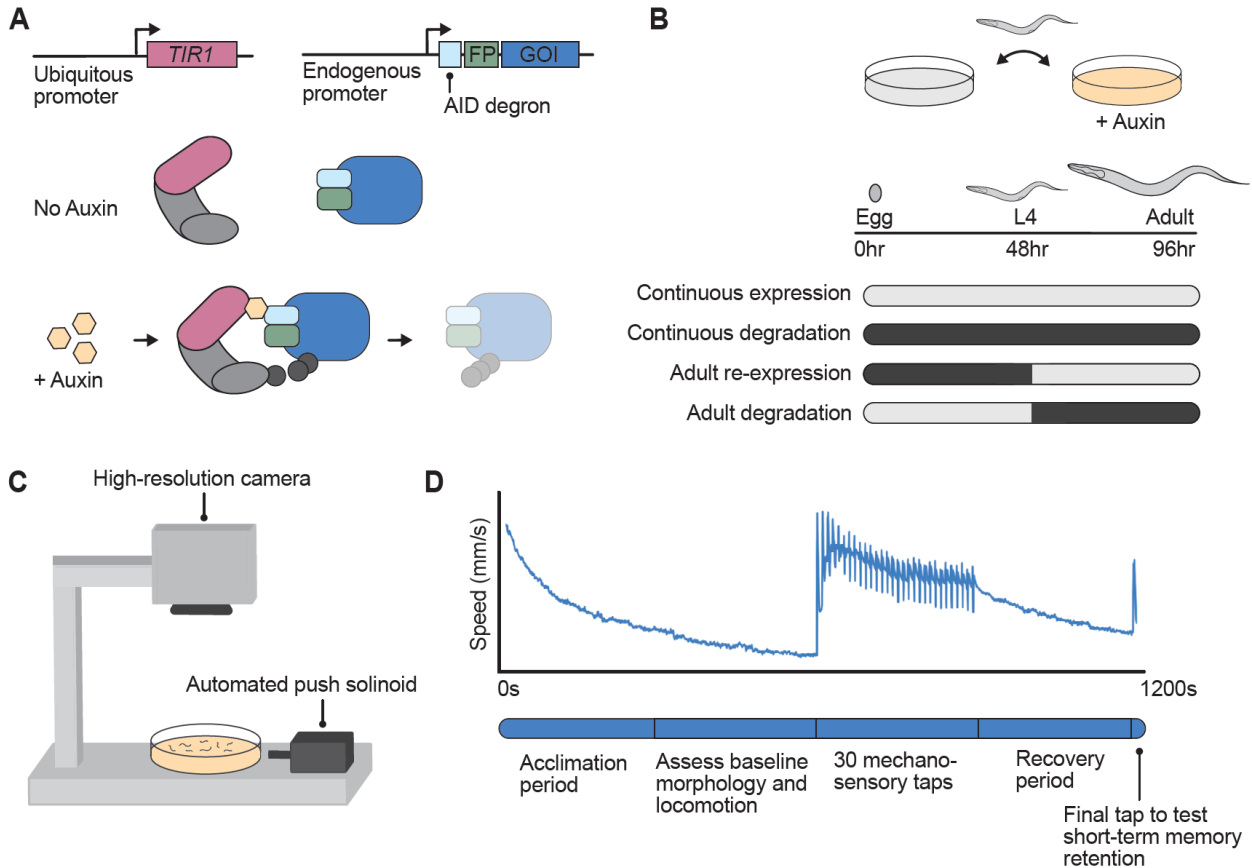

185  
186 **Figure 1. A pipeline to assess the temporal requirements and phenotypic reversibility of**  
187 **neurodevelopmental disorder risk gene orthologs using the AID system and machine**  
188 **vision phenotypic profiling in *Caenorhabditis elegans*.** A) The Auxin-Inducible Degradation  
189 (AID) system is a powerful approach that enables temporal and spatial control of protein depletion.  
190 CRISPR-Cas9 is used to tag the gene of interest (GOI) with the AID degnon along with a  
191 fluorescent protein (FP) to visualize protein expression *in vivo*. In the presence of the small  
192 molecule Auxin, TIR1 (an E3 ubiquitin ligase) associates with the AID degnon, recruiting  
193 endogenous proteasomes to degrade the ubiquitinated protein of interest. B) Temporal  
194 degradation conditions were created by manually transferring animals on and off Petri plates  
195 containing Auxin to inactive or restore gene function at specific timepoints in development or  
196 adulthood. C) The effects of protein degradation and re-expression across 26 morphological,  
197 locomotor, and sensory and learning phenotypes were objectively quantified in hundreds of  
198 animals simultaneously using a machine vision tracking system throughout a short-term  
199 mechanosensory habituation paradigm (D).

200



201 We systematically assessed the functional consequence of multiple developmental  
202 degradation time windows *in vivo* by transferring animals on or off plates containing Auxin at  
203 precise time points in *C. elegans* development (**Fig. 1B**). We used our high-throughput machine  
204 vision tracking system, the Multi-Worm Tracker (MWT) (Swierczek et al., 2011), to quantify 26  
205 phenotypes spanning morphology, baseline locomotion, sensory responding, and learning while  
206 animals were subjected to a short-term mechanosensory habituation behavioral paradigm (**Fig.**  
207 **1C & D**). Our phenotypic features included multiple measures of mechanosensory responding  
208 and habituation learning, as both are disrupted across neurodevelopmental disorders (Green et  
209 al., 2019, 2015; McDiarmid et al., 2017; Williams et al., 2013), and because we have previously  
210 shown that different components of a single behavioral response can be mediated by genetically  
211 dissociable underlying mechanisms (Ardiel et al., 2018; Kindt et al., 2007; McDiarmid et al., 2019;  
212 Randlett et al., 2019). Inclusion of a range of phenotypes not only aids in characterizing gene  
213 function across development, but also enables any unexpected phenotypes caused by protein re-  
214 expression to be captured.

215

### 216 ***The transcription factor EBF3•unc-3 displays a reciprocal pattern of phenotypic induction*** 217 **and reversibility across development**

218 The first neurodevelopmental disorder risk gene we assessed was *EBF3•unc-3*, which is  
219 a highly conserved transcription factor. In *C. elegans*, *unc-3* that acts to specify the identity of  
220 different neuronal classes by initiating and maintaining the expression of class-specific effector  
221 genes (**Fig. 2A**) (Kratsios et al., 2017; Prasad et al., 2008, 1998). Variants in *EBF3* have been  
222 associated with multiple neurodevelopmental disorders including ASD and ID, and are thought to  
223 confer risk through haploinsufficiency or by interfering with DNA binding (Chao et al., 2017; Lopes  
224 et al., 2017; Slevin et al., 2017; Tanaka et al., 2017). In *C. elegans*, *unc-3* loss-of-function results  
225 in severe locomotion and coordination defects caused by undifferentiated/abnormal identity of

226 cholinergic motor neurons in the ventral nerve cord (Brenner, 1974; Feng et al., 2020; Kratsios et  
227 al., 2017; Prasad et al., 1998).

228

229 In our paradigm, continuous degradation of UNC-3 from egg through to adulthood  
230 produced uncoordinated locomotion, an inability to respond to mechanosensory stimuli, and  
231 severe alterations in several other morphological and behavioral phenotypes (**Fig. 2B & D and**  
232 **Fig 3**). Early adult inactivation of *unc-3* (achieved by beginning Auxin exposure at the final larval  
233 stage, L4) induced impairments for the majority of affected phenotypes, supporting previous  
234 findings that *unc-3* function is continuously required throughout development (Feng et al., 2020;  
235 Kratsios et al., 2017; Li et al., 2020) (**Fig. 2B**). Importantly, impairments in mechanosensory  
236 response probability and several other altered phenotypes were partially rescued in animals when  
237 UNC-3 was degraded during development but was re-expressed from the endogenous locus  
238 starting in early adulthood (animals taken off Auxin immediately after L4) (**Fig. 2C**).

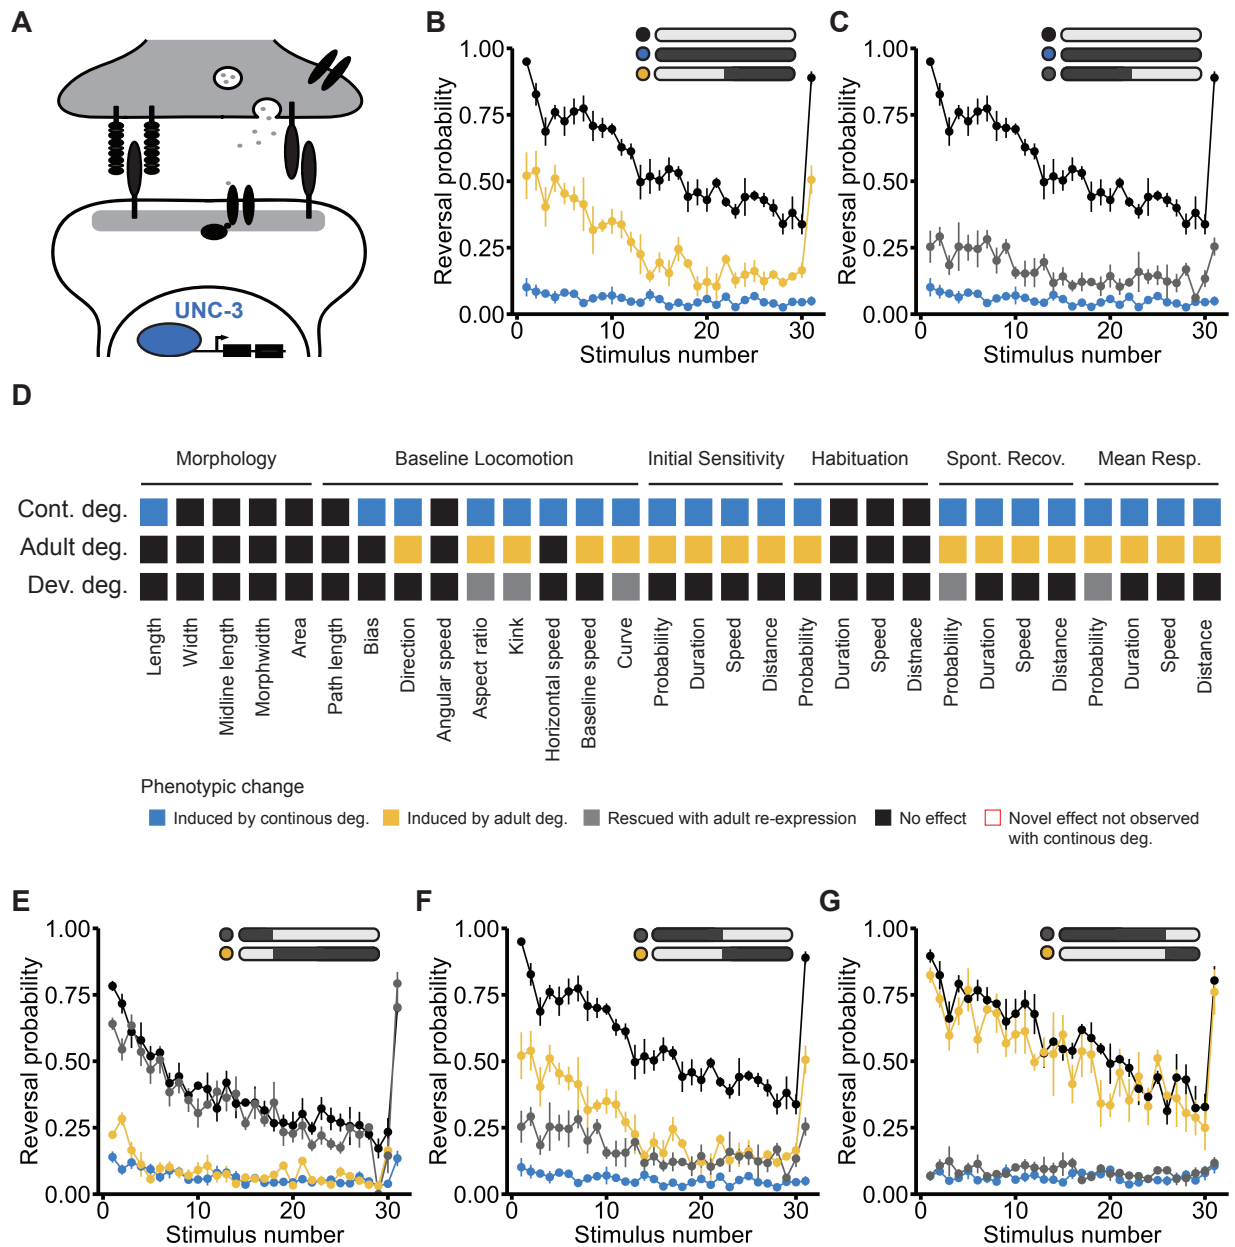

239  
 240 **Figure 2. The transcription factor *EBF3•unc-3* displays a reciprocal pattern of phenotypic**  
 241 **induction and reversibility across development.** A) The transcription factor *EBF3•unc-3* acts  
 242 to specify neuronal identity. B) Continuous degradation *unc-3* (blue) impaired the animals' ability  
 243 to respond to mechanosensory stimuli compared to the no-Auxin control (black). Starting Auxin  
 244 exposure at L4 partially induced this impairment. C) Ending Auxin exposure after L4 (48 hrs post-  
 245 hatch) partially rescued the impairment in response probability. D) Full phenotypic profile of *unc-*  
 246 *3*, indicating all phenotypes induced by continuous degradation (blue), induced by adult-specific  
 247 degradation (starting at L4, yellow), and rescued with adult re-expression (gray). E) Ending Auxin  
 248 exposure at L2 (24 hrs post-hatch, gray) almost completely rescued the impairment, F-G) with the  
 249 level of phenotypic rescue decreasing with later onset of UNC-3 re-expression. E) Starting Auxin  
 250 exposure at L2 (yellow) induced an impairment level similar to the continuous degradation group,  
 251 F-G) with the degree of phenotypic impairment decreasing with later onset of UNC-3 degradation.

252

253 Our initial findings of partial rescue of some phenotypes following protein re-expression  
254 starting at early adulthood motivated us to explore whether earlier restoration of *unc-3* function  
255 would produce more effective rescue. Re-expression of UNC-3 during late post-embryonic  
256 development (ending Auxin exposure at L2) resulted in an almost complete rescue of impairments  
257 in response probability (**Fig. 2E**). Further, starting UNC-3 degradation during late post-embryonic  
258 development produced more severe impairments which were similar to the continuous  
259 degradation control, suggesting *unc-3* plays a critical role between L2 and L4 for reversal  
260 probability (**Fig. 2E**). Lastly, we explored the phenotypic consequences of exposing or removing  
261 3-day old animals (young adult- 72 hrs post-hatch) from Auxin. Re-expression of UNC-3 in  
262 adulthood did not rescue impairments in response probability, reaffirming that the crucial  
263 functional period of *unc-3* occurs during development. In line with this, starting UNC-3 degradation  
264 at 72 hrs post-hatch did not induce impairments, suggesting that the role of *unc-3* in maintaining  
265 the expression of terminal identity genes throughout the lifespan may not be required for normal  
266 behaviour once the nervous system has fully developed.

267

268 Assessment across the three temporal conditions revealed a striking reciprocal pattern of  
269 *unc-3* temporal function for response probability (**Fig. 2E-G**). The degree of phenotypic  
270 impairment for response probability induced by inactivation of *unc-3* at a given developmental  
271 time point almost perfectly mirrored the degree of reversibility possible with re-expression (**Fig.**  
272 **2E-G**). While some other phenotypes followed this reciprocal pattern others did not (**Fig. 3A-F**).  
273 For example, reversal duration seems to be mediated by a mechanism that acts earlier in  
274 development, with reversibility only possible with early re-expression (**Fig. 3G-I**). Taken together,  
275 these results clearly demonstrate that the temporal windows of gene function can drastically vary  
276 by phenotype, and that both the degree of reversibility and number of reversible phenotypes can  
277 be influenced by how early re-expression occurs in development. Importantly, these findings

278 reveal that *unc-3* expression can rescue multiple phenotypic alterations relatively late in life,  
 279 prioritizing this gene as a candidate for further study.

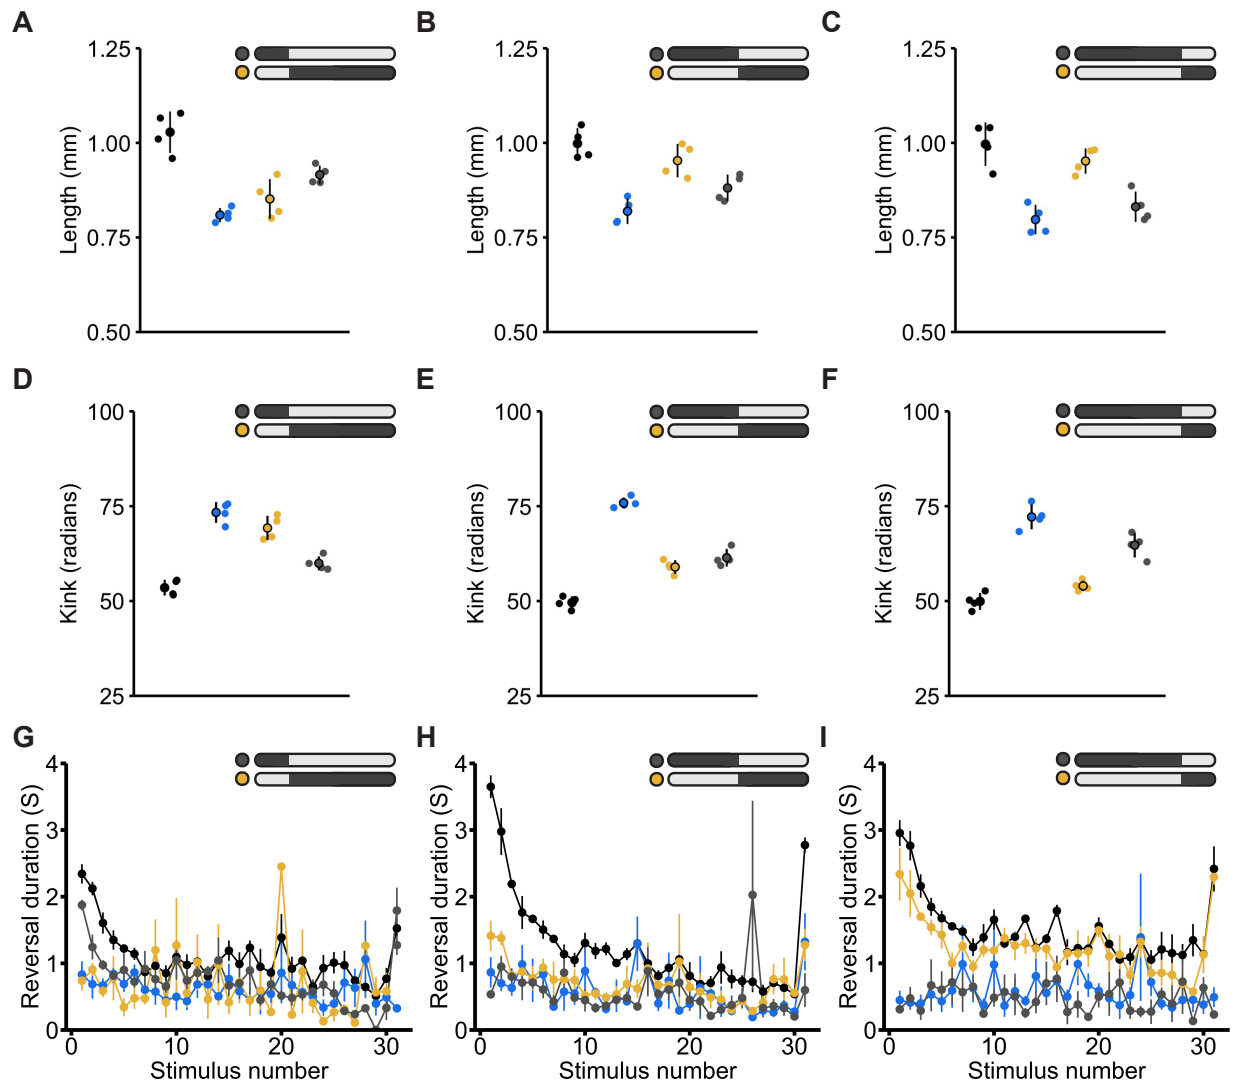

280  
 281 **Figure 3. *EBF3•unc-3* shows diverse temporal patterns of phenotypic reversibility across**  
 282 **morphological, locomotor, and mechanosensory response phenotypes.** A) The no-Auxin  
 283 control group is depicted in black and continuous degradation group is depicted in blue for all  
 284 panels. Altered animal length could be partially rescued with early post embryonic re-expression  
 285 (starting at L2/24 hrs post-hatch) or fully induced with early post embryonic degradation. B) The  
 286 degree of rescue and impairment of animal length increasingly diminished if *UNC-3* was re-  
 287 expression or degraded at L4 (48 hrs post-hatch) C) or in adulthood (72 hrs post-hatch). D)  
 288 Similarly, impairments in kink could be fully rescued with early post embryonic re-expression, E-  
 289 F) but degree of rescue diminished with later re-expression. D) Degrading *UNC-3* starting at L2  
 290 resulted in impaired kinkiness to a level similar to the continuous degradation control group, E-F)  
 291 the degree of impairment lessened with later onset of degradation. G-I) Impairments in response

292 duration could not be rescued with UNC-3 re-expression across any of the tested temporal  
293 conditions. G-H) Degrading UNC-3 in early post embryonic development or development (L4)  
294 induced impairments similar to the continuous degradation condition, I) yet duration impairments  
295 were not induced with UNC-3 degradation starting at 72 hrs post-hatch.  
296

297 ***BRN3A•unc-86* specifically impairs mechanosensory response probability and displays a**  
298 **reversibility window restricted to early post-embryonic development**

299 *BRN3A•unc-86* is a POU-type transcription factor that plays conserved roles in the  
300 initiation and maintenance neuronal identity across species (Badea et al., 2009; Serrano-Saiz et  
301 al., 2018; Xiang et al., 1995; Zou et al., 2012). Variants in *POUF4/BRN3A* have been associated  
302 with abnormal development of sensory structures, including auditory (Huang et al., 2001) and  
303 visual cells (Badea et al., 2009). In *C. elegans*, *unc-86* is thought to be required across the lifespan  
304 to maintain the expression of terminal identity genes in multiple neuronal subtypes (Serrano-Saiz  
305 et al., 2018; Sze and Ruvkun, 2003) (**Fig. 4A**).

306  
307 Analysis of 30 quantitative phenotypes revealed that continuous degradation of UNC-86  
308 specifically impaired mechanosensory response probability (**Fig. 4B**). Animals were  
309 hyporesponsive to mechanosensory stimuli, with a lower likelihood of responding throughout the  
310 tracking session, while other parameters of the reversal response (e.g. duration and speed) were  
311 not affected. Re-expression of UNC-86 in early adulthood did not rescue these impairments (**Fig.**  
312 **3C**) and exposing animals to Auxin from L4 onwards did not induce the hyporesponsive  
313 phenotype seen with continuous degradation (**Fig. 4B**). Together, these findings suggest a  
314 primarily early developmental role for *unc-86* in regulating mechanosensory responses. While we  
315 found that impairing *unc-86* from L4 onwards did not induce any significant impairments, a  
316 previous study found that inactivating *unc-86* at L4 using a temperature-sensitive allele resulted  
317 in impaired chemotaxis to multiple odorants (Sze and Ruvkun, 2003). These differences may  
318 suggest that *unc-86* has distinct temporal functional windows in different neuronal classes (i.e.

319 *unc-86* is continuously required for the function of chemotaxis neurons but is only required in early  
 320 development for function of mechanosensory neurons).

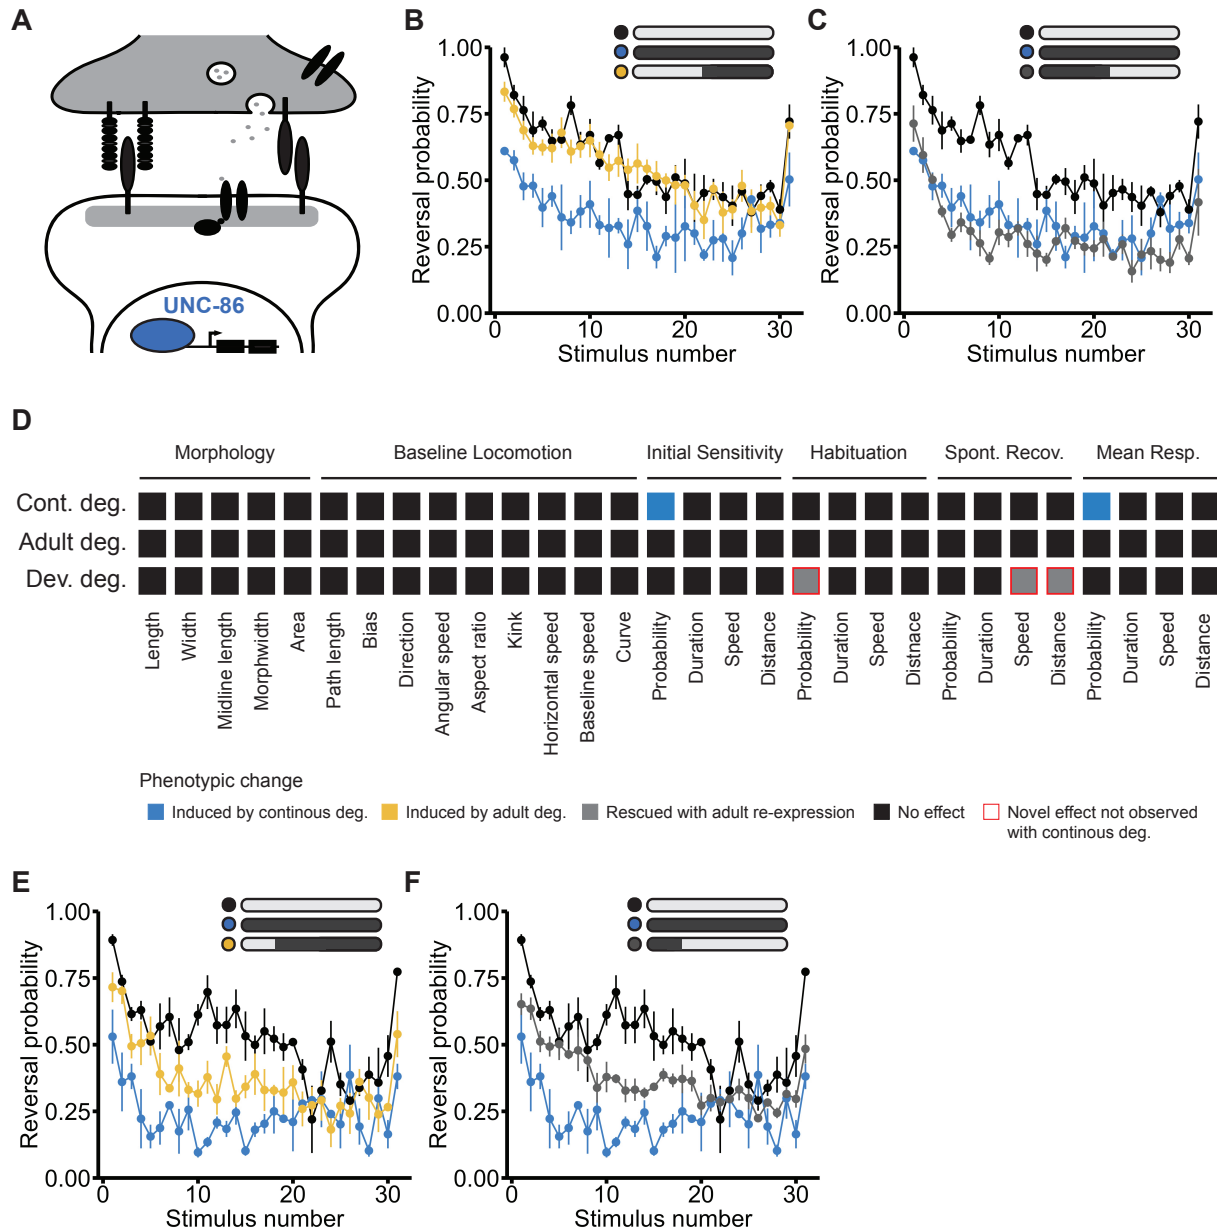

321  
 322 **Figure 4. *BRN3A•unc-86* specifically impairs mechanosensory response probability and**  
 323 ***displays a reversibility window restricted to early post-embryonic development.*** A) The  
 324 transcription factor *BRN3A•unc-86* acts maintain the expression of terminal identity genes in  
 325 multiple neuron types. B) Continuous degradation of *UNC-86* (blue) specifically impaired  
 326 response probability to mechanosensory stimuli compared to animals that were not exposed to  
 327 Auxin (black). Staring Auxin exposure at L4 (48 hrs post-hatch, yellow) did not significantly induce  
 328 phenotypic impairments. C) Ending Auxin exposure at L4 (gray) did not rescue impairments in  
 329 response probability. D) Full phenotypic profile of *unc-86*, indicating all phenotypes induced by

330 continuous degradation (blue), induced by adult-specific degradation (starting at L4, yellow), and  
331 rescued with adult re-expression (gray). E) Exposing animals to Auxin starting at L2 (yellow)  
332 induces impairments in response probability. F) Ending Auxin exposure at L2 (24 hrs post-hatch,  
333 gray) enabled phenotypic rescue.

334  
335  
336 We next investigated the phenotypic consequences of degrading and re-expressing UNC-  
337 86 starting at an earlier developmental time point (specifically 24 hours after age-synchronization  
338 during late post-embryonic development; beginning after L2). Restoration of *unc-86* expression  
339 beginning at this earlier time point was sufficient to completely rescue impairments in  
340 mechanosensory hyporesponsivity (**Fig. 4E**). In contrast, we found that degrading UNC-86 from  
341 this same time point onwards also impaired response probability (**Fig. 4F**). These results suggest  
342 the window of phenotypic reversibility for *unc-86* extends into early post-embryonic development.  
343 Moreover, these results indicate that as long as *unc-86* has played its role in neurodevelopment  
344 in this early critical window, it is no longer required for normal mechanosensory responding in  
345 adulthood.

346  
347 **Ubiquitous degradation of the essential protein *DYNC1H1•dhc-1* in adult animals reveals**  
348 **specific roles in mechanosensory responding and habituation**

349 *DYNC1H1•dhc-1* is an essential motor protein implicated in diverse processes including  
350 cell division and cargo transport along microtubules (e.g. retrograde axonal transport in neurons)  
351 (Cianfrocco et al., 2015) (**Fig. 5A**). Variants in *DYNC1H1* have been implicated in several  
352 neurodevelopmental disorders including ID and ASD (Satterstrom et al., 2020; Willemsen et al.,  
353 2013). Determining the biological functions of *DYNC1H1•dhc-1* throughout development has  
354 been challenging as dynein loss-of-function results in early embryonic lethality in multiple model  
355 organisms (Hamill et al., 2002; Harada et al., 1998; Howell and Rose, 1990; Mains et al., 1990;  
356 Robinson et al., 1999). As a result, the role of *DYNC1H1•dhc-1* in behaviour remains relatively  
357 uncharacterized.

358



359           Here, we used the AID system to ubiquitously degrade DHC-1. As expected from loss-of-  
360 function alleles, continuous degradation of dynein was lethal. Degrading dynein in early adulthood  
361 (starting Auxin exposure immediately after L4) also resulted in lethality, indicating that dynein  
362 function remains essential throughout the late stages of *C. elegans* development. To determine  
363 whether dynein function is essential in adulthood, we ubiquitously degraded dynein in 3-day old  
364 adults (beginning 72 hrs post-hatch). We found that degrading dynein in adulthood was not lethal,  
365 allowing us an opportunity to investigate the biological functions of dynein in adult animals.

366

367           Despite its broad expression and essential role in early development, degradation of  
368 dynein later in life revealed surprisingly specific roles in adult behaviour (**Fig. 5A-F**). Adult-specific  
369 degradation of dynein did not cause severe alterations in morphology or baseline locomotion.  
370 Instead, only select components of the mechanosensory reversal response were affected while  
371 others were left intact. Response probability was unaffected, as the proportion of worms that  
372 responded to each mechanosensory stimulus was similar to the no Auxin control (**Fig. 5B**).  
373 However, degrading dynein at 72 hrs post-hatch caused animals to display deeper habituation of  
374 response duration (**Fig. 5C**) and a slower response speed compared to animals not exposed to  
375 Auxin (**Fig. 5D**). Interestingly, the absolute speed trace across the entire experiment shows  
376 animals have the ability to respond as fast as control animals but decrement their response speed  
377 faster with repeated stimulation (**Fig. 5E**). These findings suggest that, in adulthood, dynein may  
378 function to promote normal habituation of response duration and speed, but not response  
379 probability. Taken together, these results support the hypothesis that different components of  
380 habituation can be mediated by distinct mechanisms, and reveal novel, adult-specific roles for  
381 *DYNC1H1•dhc-1* in mechanosensory responding and habituation (**Fig. 5F**)

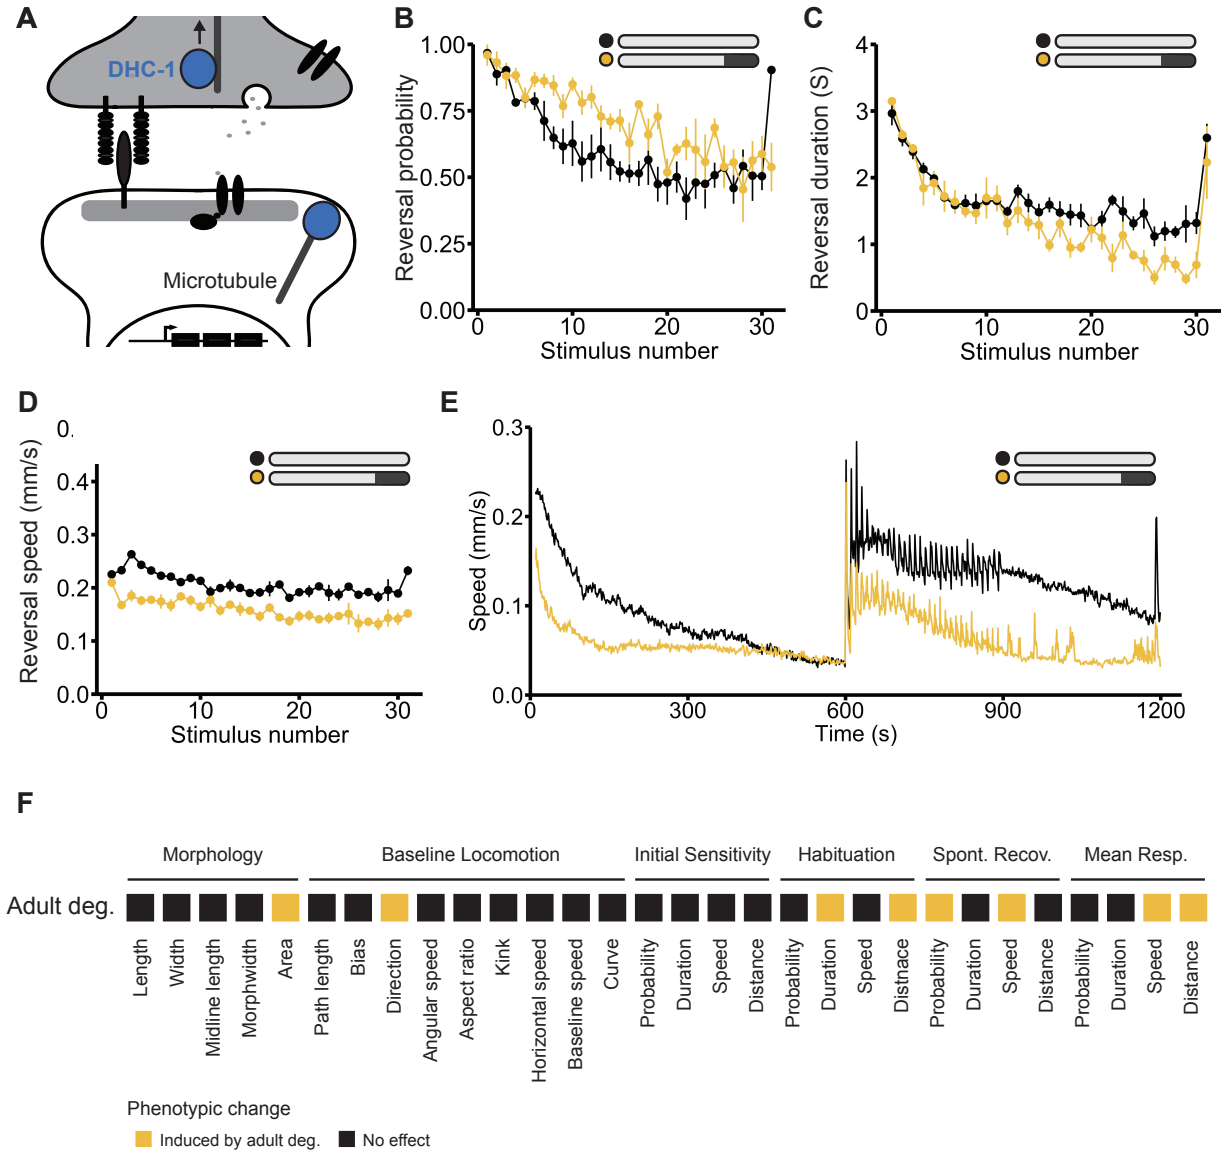

382  
 383 **Figure 5. Ubiquitous degradation of the essential protein *DYNC1H1•dhc-1* in adult animals**  
 384 **reveals specific roles in mechanosensory responding and habituation.** A) The essential  
 385 gene *DYNC1H1•dhc-1* acts in cargo transport and stabilization of microtubule dynamics. B)  
 386 Starting Auxin exposure in early adulthood (72 hrs post-hatch) did not impair response probability  
 387 but C) did deepen habituation of response duration and D) decreased response speed compared  
 388 to the no-Auxin control animals (black). E) Degrading dynein in adult animals (yellow) decreased  
 389 average speed during the acclimation period and caused deeper habituation of response speed  
 390 across the mechanosensory stimuli resulting in a lower average speed during the rest period post  
 391 mechanosensory stimulation. F) Full phenotypic profiles of *dhc-1*, indicating all phenotypes  
 392 induced by adult-specific degradation starting at 3 days post synchronization (yellow).  
 393

394 **Pan-neuronal degradation of *DYNCH1•dhc-1* is not lethal and causes multiple habituation**  
 395 **impairments with distinct reversibility profiles**

396           To further investigate the role of dynein across development, we took advantage of the  
397 ability to activate the AID system cell specifically and obtained a line of *C. elegans* that allowed  
398 for specific and reversible degradation of dynein only in neurons by driving *TIR1* expression under  
399 the *rab-3* promoter (**Fig. 6A**). Continuous pan-neuronal degradation of dynein did not cause  
400 lethality, offering us an unprecedented opportunity to determine the phenotypic consequences of  
401 decreased dynein function in the nervous system throughout development and whether the  
402 resulting impairments were reversible.

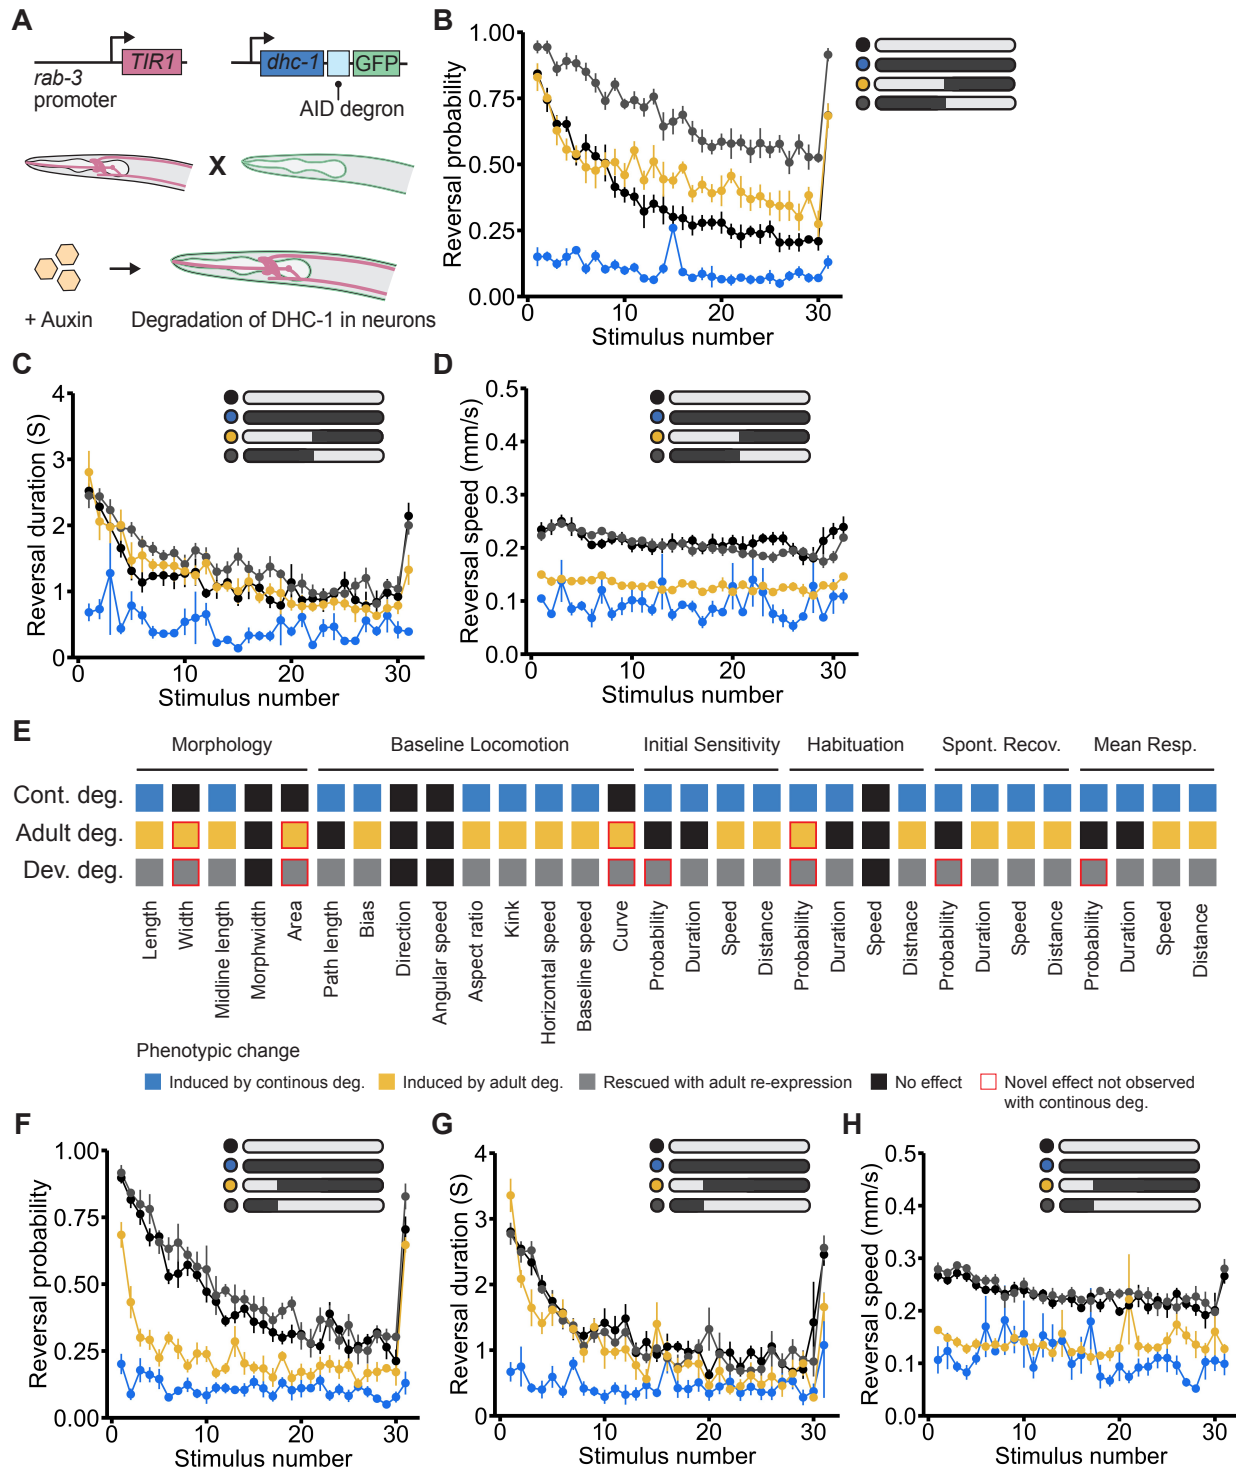

403  
 404 **Figure 6. Pan-neuronal degradation of DYNCH1•dhc-1 is not lethal and causes multiple**  
 405 **habituation impairments with distinct reversibility profiles.** A) Pan neuronal degradation of  
 406 dynein was achieved by crossing the *dhc-1*(*ie28[dhc-1::degron::GFP]*) strain with a strain where  
 407 *TIR1* expression is driven by the *rab-3* promoter. B) Continuous degradation of neuronal dynein  
 408 (blue) impaired response probability compared to the no-Auxin control group (black). Re-  
 409 expressing (gray) or degrading (yellow) neuronal dynein starting at L4 (48 hrs post-hatch) caused

410 animals to be hyperresponsive to mechanosensory stimuli. C and D) Impairments in response  
411 duration and response speed could be rescued with re-expression of dynein starting at L4 (gray).  
412 Starting degradation of neuronal dynein at L4 (yellow) did not induce significant impairments in  
413 response duration but did induce impairments in response speed. E) Full phenotypic profile of  
414 *dhc-1*, indicating all phenotypes induced by continuous degradation (blue), induced by adult-  
415 specific degradation (starting at L4, yellow), and rescued with adult re-expression (gray). F)  
416 Exposing animals to Auxin at L2 (24 hours post-hatch) impaired response probability (yellow) and  
417 ending Auxin exposure at L2 rescued impairments in response probability (gray). G and H)  
418 Impairments in response duration and speed were rescued with re-expression of dynein starting  
419 at L2 (gray). Starting Auxin exposure at L2 (yellow) did not affect response duration, but did impair  
420 response speed.  
421

422           Continuous pan-neuronal degradation of dynein caused a broad range of sensory  
423 responding impairments, including a low probability of responding to mechanosensory stimuli,  
424 rapid habituation of response duration, and lower response speed (**Fig. 6B-E and Fig. 7A-D**). In  
425 this case, multiple phenotypes showed distinct temporal functional windows and reversibility  
426 patterns. Re-expression of dynein in early adulthood (ending Auxin exposure immediately after  
427 L4) did not restore normal mechanosensory responding, but instead resulted in severely impaired  
428 habituation of response probability (animals were hyperresponsive and did not learn to decrease  
429 their likelihood of responding to repeated stimuli) (**Fig. 6B**). Adult pan-neuronal degradation of  
430 dynein (beginning Auxin exposure at L4) did not alter initial response probability but did decrease  
431 habituation of response probability (**Fig. 6B**). For response duration, adult re-expression of dynein  
432 was sufficient to fully rescue the impairment seen with continuous degradation, but adult  
433 degradation did not induce the response duration impairment (**Fig. 6C**). Consistent with our  
434 findings for ubiquitous dynein degradation in 72 hr old adult animals, continuous degradation of  
435 pan neuronal dynein also caused animals to exhibit slower reversal speed. The speed impairment  
436 could be rescued with dynein re-expression in early adulthood and was also induced by adult  
437 degradation (**Fig. 6D**) suggesting that dynein is continuously required in neurons to mediate  
438 response speed.

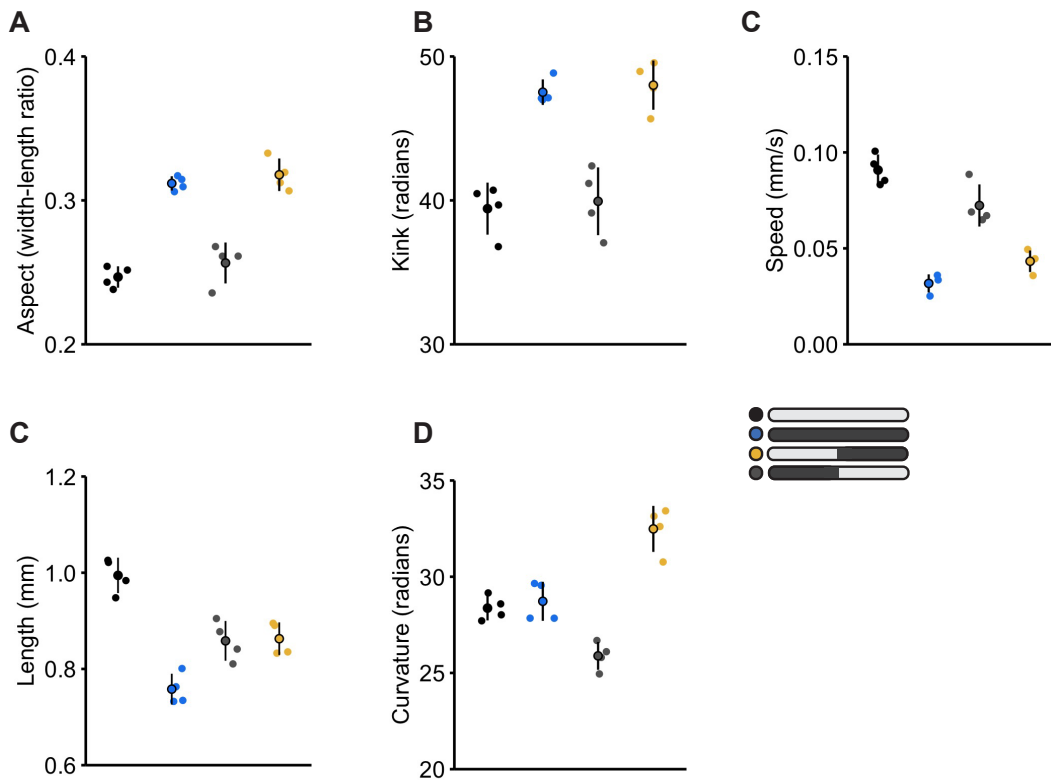

439  
440 **Figure 7. Pan-neuronally degrading and re-expressing dynein reveals distinct temporal**  
441 **functional windows for morphological and baseline locomotion features.** The no-Auxin  
442 control group is depicted in black and continuous degradation group is depicted in blue for all  
443 panels. (A-C) Dynein is continuously required in neurons for normal kinked body posture, aspect-  
444 ratio, and movement direction bias. Degrading DHC-1 in neurons beginning at L4 (48 hrs post-  
445 hatch) induced impairment levels across these phenotypes similar to the continuous degradation  
446 control. Pan neuronal re-expression of DHC-1 at L4 (grey) rescued impairments in all three  
447 phenotypes. D) Re-expression of DHC-1 at L4 rescued speed before the onset mechanosensory  
448 stimuli, however only partially rescued speed deficits in the 5 min rest period. Degrading dynein  
449 at L4 (yellow) caused animals to exhibit lower speed throughout the behavioural paradigm that  
450 was similar to the continuous degradation control. E) Dynein is continuously required in neurons  
451 for animal length, but re-expression at L4 can partially rescue impairments F) Novel impairments  
452 in animal curvature occurred when dynein was re-expressed at L4. Beginning protein degradation  
453 at L4 caused animals to have a higher body curvature than the no-Auxin control, whereas re-  
454 expressing pan neuronal DHC-1 at L4 caused animals to exhibit a lower body curvature than  
455 controls.  
456

457 We next investigated the phenotypic consequence of degrading and re-expressing dynein  
458 in neurons at an earlier time point in development. Re-expressing dynein during early post-  
459 embryonic development (starting Auxin exposure at L2) fully rescued impairments in response

460 probability while starting degradation at L2 produced a similar level of impairment in response  
461 probability as the continuous degradation condition (**Fig. 6F**). Importantly, the lack of the novel  
462 hyperresponsive reversal probability phenotype that occurred when dynein was re-expressed at  
463 L4 suggests that for certain genes there will be crucial windows in development when re-  
464 expression must occur to avoid inducing alternative impairments. For reversal duration and  
465 speed, impairments in both phenotypes were fully rescued with re-expression starting at L2 (**Fig.**  
466 **6G-H**). Earlier degradation did not induce impairments in reversal duration, suggesting the crucial  
467 functional window of DHC-1 for reversal duration is occurring prior to L2 but is not required  
468 throughout the lifespan (**Fig. 6G**). Earlier degradation did lower reversal speed (**Fig. 6H**),  
469 providing more evidence that DHC-1 is continuously required for this phenotype. Together, these  
470 results reveal many new roles for dynein in the developing and adult nervous system and illustrate  
471 the diversity of temporal functional windows that can be observed for a single gene (**Fig. 6E**).

472

### 473 **Comparison of temporal profiles reveals shared phenotypic disruptions and prioritizing** 474 **principles of phenotypic reversibility**

475 All neurodevelopmental disorder risk genes assessed here showed post-embryonic  
476 reversibility for at least one impaired phenotype, with several showing phenotypic reversibility  
477 relatively late in development (e.g. after stopping Auxin exposure at L4; **Fig. 8A**). Looking across  
478 all genes assessed, at least one phenotype within each phenotypic class (morphology,  
479 locomotion, mechanosensory responding, and learning) could be reversed later in life, suggesting  
480 a degree of flexibility in when multiple cellular processes can occur during development (**Fig. 8A**).  
481 However, not all phenotypes caused by the inactivation of a single gene could be reversed, even  
482 if reversibility was possible for other affected phenotypes (**Fig. 8A**). These results suggest that  
483 multiple phenotypic disruptions stemming from a single affected gene can show distinct windows  
484 of reversibility (**Fig. 8A**). In addition, there were also cases where the same organism-level  
485 phenotypic disruption (e.g. impaired mechanosensory responding) could be rescued later in

486 development by re-expression of one of the genes, but not others (**Fig. 8A-C**). Based on our  
487 results, *EBF3*•*unc-3* is a promising candidate for further research as many impaired phenotypes  
488 could be reversed even when gene function was restored later stages of development (**Fig. 8A**),  
489 and re-expression did not induce novel phenotypic disruptions (**Fig. 2 & 3**). Further, identifying  
490 which phenotypes are most commonly affected across risk genes may provide insight into points  
491 of convergence in the mechanisms that are altered in neurodevelopmental disorders (**Fig. 8B**).  
492 We found that reversal probability metrics appeared to be both the most affected and reversible  
493 phenotypes across all genes assessed (**Fig. 8B & C**). This finding supports previous work from  
494 multiple model organisms which found that inactivating neurodevelopmental disorder risk genes  
495 commonly impaired habituation of response probability (Fenckova et al., 2019; McDiarmid et al.,  
496 2020) and that impairments in habituation caused by inactivation of the ASD risk gene ortholog  
497 neuroligin (*NLGN1/2/3/X•nlg-1*) could be partially rescued with adult re-expression (McDiarmid et  
498 al., 2020).



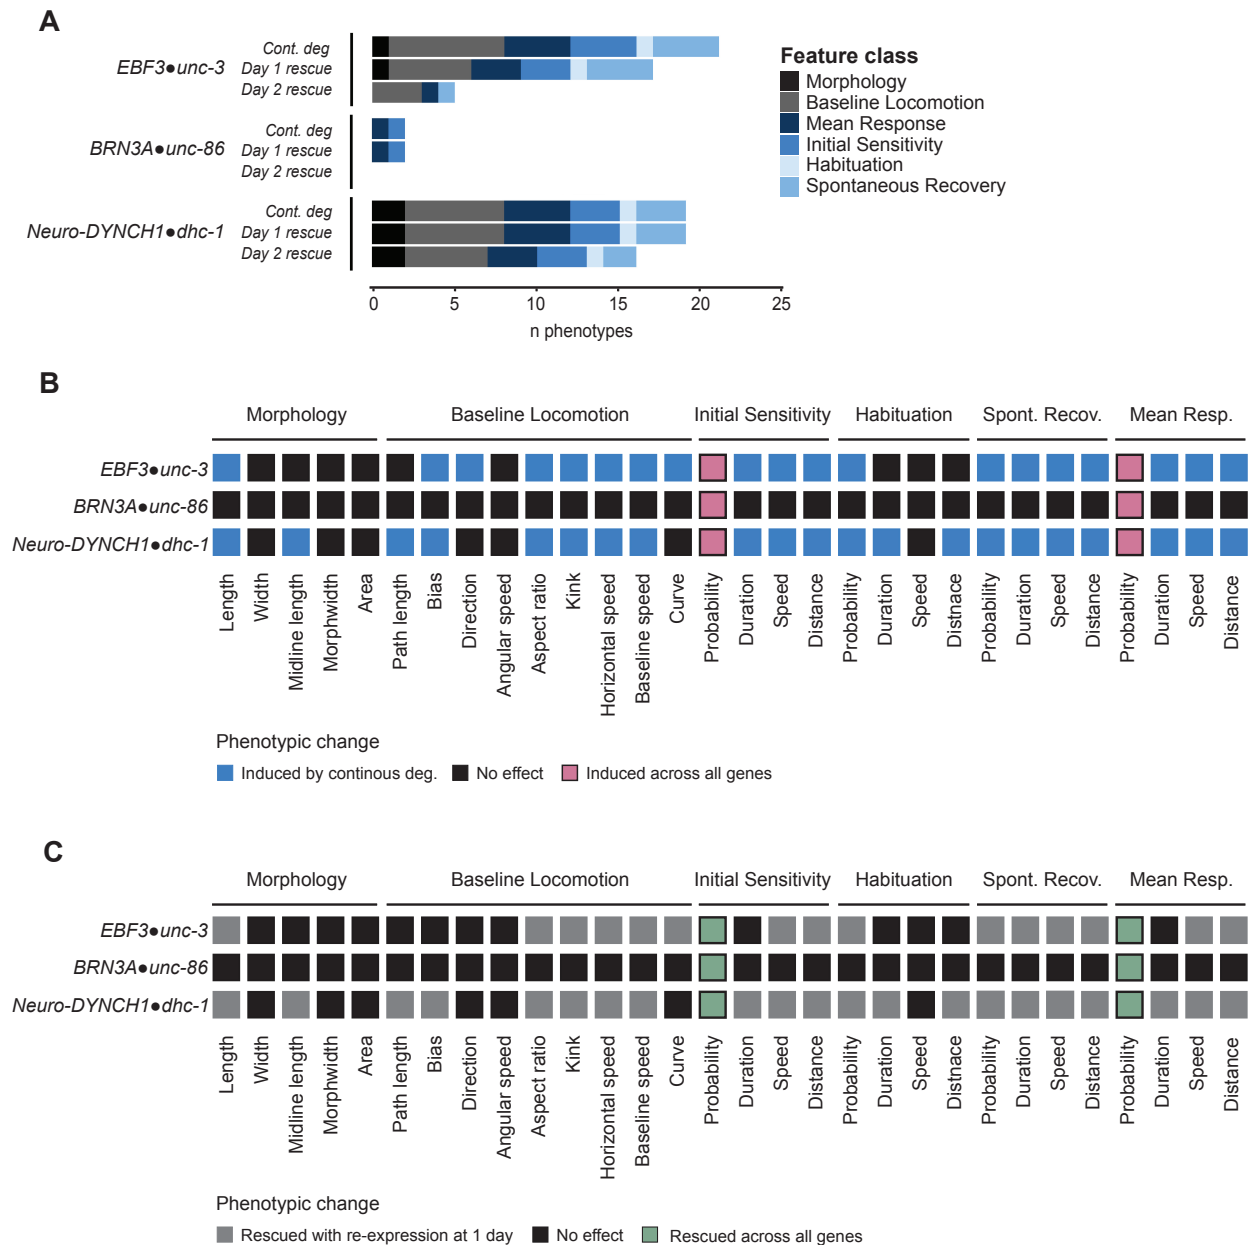

499  
 500 **Figure 8. Comparison of temporal profiles reveals shared phenotypic disruptions and**  
 501 **prioritizing principles of phenotypic reversibility.** A) Number and kind of phenotypes that  
 502 could be induced by continuously degrading each gene or reversed by re-expressing the gene  
 503 24h (L2 stage) or 48h (L4 stage) after synchronization (i.e. early or late in post-embryonic  
 504 development). B) Heatmap showing the phenotypes affected by continuous degradation of each  
 505 gene. Phenotypes observed in all 3 genes are highlighted in red. C) Heatmap showing the  
 506 phenotypes that could be rescued with protein re-expression starting at L2 (24 hours post  
 507 synchronization). Phenotypes that were reversible across all 3 genes are highlighted in green.  
 508

509

## 510 Discussion

511 We systematically investigated the effect of degrading and re-expressing multiple  
512 neurodevelopmental disorder risk gene orthologs across a suite of morphological, locomotor,  
513 sensory, and learning phenotypes in thousands of freely behaving animals using our high-  
514 throughput machine vision tracking system. Taking advantage of the CRISPR-Cas9 AID system  
515 allowed us to test whether restoring protein levels through re-expression from the endogenous  
516 locus was sufficient for phenotypic rescue at multiple time points throughout development. We  
517 found that each gene displayed unique temporal functional windows and phenotypic profiles (**Fig.**  
518 **8**). *DYNCH1*•*dhc-1* function is continuously essential for development and plays a specific role  
519 in adult mechanosensory behavior. The transcription factor *BRN3A*•*unc-86* can only reverse  
520 phenotypic disruptions early in post-embryonic development and is not required for adult function,  
521 suggesting a primarily developmental role in mechanosensory responding. The transcription  
522 factor *EBF3*•*unc-3* displayed a range of temporal requirements throughout the lifespan and can  
523 reverse multiple phenotypic disruptions later in life. In addition to the 3 genes tested in this study,  
524 previous findings from our lab provide the temporal requirements for another neurodevelopmental  
525 disorder risk gene, the synaptic cell adhesion molecule *NLGN1/2/3/4/X*•*nlg-1*. Adulthood re-  
526 expression of *NLGN1/2/3/4/X*•*nlg-1* can partially reverse impairments in habituation of response  
527 probability, however, once neuroligin has functioned to build a circuit capable of normal sensory  
528 processing it is no longer required in adulthood for normal short-term habituation (McDiarmid et  
529 al., 2020). Together, these results reveal a remarkable diversity in temporal phenotypic profiles  
530 across neurodevelopmental disorder risk genes that would be missed by approaches that focus  
531 on a single phenotype or developmental timepoint. The approach established in this study can be  
532 used to systematically assess the temporal requirements and phenotypic reversibility of  
533 neurodevelopmental disorder risk genes at an unprecedented throughput to prioritize risk genes  
534 for further assessment.

535

536           Using neuron-specific reversible protein degradation, we provide the first description of  
537 the role of dynein in behaviour across development. We found that continuous degradation of  
538 dynein in only neurons affected the majority (22/30) of the phenotypes assessed, including  
539 multiple morphology phenotypes. Interestingly, we found that both degrading or re-expressing  
540 dynein in neurons during early adulthood impaired habituation of mechanosensory response  
541 probability. Previous work from our lab has found habituation of response probability is affected  
542 by developmental stage such that habituation becomes deeper with age due to circuit rewiring  
543 and reduced sensitivity (Beck and Rankin, 1993; Rai and Rankin, 2007; Timbers et al., 2013).  
544 The impaired habituation phenotypes seen with both development and adult-specific dynein  
545 degradation could both stem from an immature nervous system, such that impairing protein  
546 function during early development temporarily impedes developmental processes from occurring  
547 whereas early adult inactivation freezes the nervous system in an immature state. Determining  
548 whether this neurodevelopmental freeze mechanism, or alternative, more complex mechanisms  
549 (e.g. changes in synaptic physiology) mediate these habituation impairments requires further  
550 study. Taken together these results reveal that dynein has several ongoing functions in the  
551 nervous system to modulate sensory and learning behaviors after it's essential period in  
552 development.

553

554           Using high-throughput model systems to rapidly assess the temporal function and  
555 phenotypic reversibility of neurodevelopmental risk genes provides critical insight into the  
556 emerging principles that should be considered in future re-expression studies. Importantly, we  
557 found restoring protein expression in adulthood may induce novel phenotypes that were not  
558 observed when proteins were continuously degraded (e.g. altered habituation with neuron-  
559 specific re-expression of dynein). This finding reveals the importance of assessing a large number  
560 of morphological and behavioral phenotypes to ensure novel adverse phenotypes do not arise  
561 when gene function is restored later in development. These studies also offer a reminder to the

562 diversity of functions of a single gene across development. Although a gene may play an important  
563 role in a phenotype under study, it also may have other functions that are not immediately obvious.  
564 Only by studying multiple phenotypes over the span of development can we begin to understand  
565 the breadth of what a given gene contributes to the organism. Future re-expression studies should  
566 not only aim to assess whether restoring gene function rescues the well-documented cell  
567 functions of the gene of interest, but also capture multiple organism-level phenotypes such as  
568 forms of learning or other behaviours commonly altered in neurodevelopmental disorders. Overall,  
569 our results suggest that earlier protein re-expression will almost always be better, yet identification  
570 of genes with longer reversibility windows and multiple reversible phenotypes in high-throughput  
571 model systems should be a key principle in prioritizing candidates for further study.

572

573         In addition, we found that time windows for when a gene is required and when re-  
574 expression can reverse impairments did not always align. While *EBF3*•*unc-3* showed reciprocal  
575 functional and reversibility windows for many affected phenotypes, we found other genes (e.g.  
576 *nlg-1* and *dhc-1*) where certain phenotypic impairments were not induced if the protein was  
577 degraded in early adulthood, but phenotypic rescue was possible if protein levels were restored  
578 at that same time point in development. In addition, while *EBF3*•*unc-3* and *BRN3A*•*unc-86* have  
579 relatively similar functions and previously described temporal functional windows, we identified  
580 stark differences in their reversibility profiles. Together, these findings highlight the need for  
581 systematic assessment of the reversibility windows of neurodevelopmental disorder risk genes  
582 across different developmental timepoints, even if there is prior indication of when the gene  
583 normally functions.

584

585         As the number of genes assessed increases, we may uncover patterns in the molecular  
586 attributes that enable certain genes to rescue impairments more broadly than others. For  
587 example, *EBF3*•*unc-3* is a putative pioneer transcription factor that may be able to more efficiently

588 remodel chromatin and rewire transcriptional networks outside of its typical developmental  
589 window compared to other transcription factors. The approach developed in this study can be  
590 adapted to determine how gene reactivation reverses more complex behaviours in *C. elegans*  
591 and more conserved model systems. Information gained from high-throughput model organisms  
592 is increasingly valuable as they enable rapid assessment of the growing list of risk genes to gain  
593 insight into principles governing neurodevelopment and how a nervous system adapts to the re-  
594 introduction of a previously inactive protein.

595

## 596 **METHODS**

### 597 **Animal maintenance**

598 Prior to Auxin experiments, all strains were maintained on Petri plates containing  
599 Nematode Growth Medium (NGM) that were seeded with *Escherichia coli* (*E. coli*) strain OP50  
600 following standard experimental procedures (Brenner, 1974). 96hr post-hatch hermaphrodite  
601 animals were used for all experiments.

602

### 603 **Auxin inducible degradation strain selection and ortholog identification**

604 All human orthologs of all Auxin-inducible degradation strains available at the CGC were  
605 identified using the Alliance of Genome Resources ortholog prediction tool and OrthoList 2  
606 (Agapite et al., 2020; Kim et al., 2018; McDiarmid et al., 2020). Auxin-inducible degradation strains  
607 for which the human ortholog corresponded to a known neurodevelopmental disorder risk gene  
608 (based on lists generated by recent large-scale sequencing studies and manual literature search  
609 (Belmadani et al., 2019; De Rubeis et al., 2014; McDiarmid et al., 2020; Satterstrom et al., 2020))  
610 were selected for analysis. Note that throughout the manuscript the “●” symbol is used to denote  
611 the relationship between the human gene and *C. elegans* ortholog under study (e.g.  
612 *DYNCH1●dhc-1*).

613

614 **Auxin plate preparation**

615 Auxin administration was performed by transferring animals to bacteria-seeded NGM  
616 plates containing Auxin (McDiarmid et al., 2020; Zhang et al., 2015). To prepare Auxin plates, a  
617 400 mM stock solution of Auxin indole-3- acetic acid (IAA) (Thermo Fisher, Alfa Aesar™  
618 #A1055614) was created by dissolving Auxin in ethanol. Molten NGM was prepared and allowed  
619 to cool to approximately 50°C. The Auxin stock was then diluted into separate flasks of molten  
620 NGM agar to final concentrations of 0.025mM, 1mM, and 4mM. The NGM agar + Auxin mixture  
621 was then poured into Petri plates and allowed to dry in the dark for 72 hrs. Auxin plates were then  
622 seeded with 50 µl of *E. coli* OP50 liquid culture 48 hrs before use. All plates were stored in the  
623 dark at room temperature (20°C) in a temperature and humidity-controlled room (McDiarmid et  
624 al., 2020; Zhang et al., 2015).

625

626 **Population age-synchronization and Auxin administration**

627 Age synchronization by egg lay was used to create the experimental groups for phenotypic  
628 analysis as previously described (McDiarmid et al., 2020; McDiarmid et al., 2020). For age  
629 synchronization, five gravid adults were placed on to either NGM or Auxin plates and allowed to  
630 lay eggs for 4 hours before removal (resulting in 50-100 animals per plate). For the development  
631 specific-degradation conditions, approximately 240 progeny were manually transferred from auxin  
632 plates onto 6 regular NGM plates (~40 animals per plate) either 24 hrs (at L2), 48 hrs (at L4), or  
633 72 hrs (at early adulthood) after synchronization (egg lay). For adult-specific degradation  
634 conditions, approximately 240 progeny were manually transferred from regular NGM plates onto  
635 6 Auxin plates (~40 animals per plate) 24 hrs (at L2), 48 hrs (at L4), or 72 hrs (at early adulthood)  
636 after synchronization. All plates remained in the dark other than when animals were being  
637 manually transferred to preserve the integrity of Auxin. 4-6 plates were run for each experimental  
638 condition.

639

## 640 Behavioral paradigm and Multi-Worm Tracker phenotypic analysis

641 The Multi-Worm Tracker (MWT) was used for all behavioural tracking experiments  
642 (Swierczek et al., 2011). Each plate was subjected to the same short-term habituation behavioural  
643 paradigm (see results and **Fig. 1D**) that began with a 5 min period to allow worms to acclimate to  
644 being placed on the MWT. After acclimation, we collected data for an additional 5 min period to  
645 assess baseline locomotion and morphology features (**Fig. 1D**). Following this baseline period,  
646 thirty mechanosensory stimuli were administered to the side of the Petri plate using an automated  
647 push-solenoid at a 10 second inter-stimulus interval (**Fig. 1D**). These non-localized  
648 mechanosensory stimuli cause animals to perform a reversal response, where animals briefly  
649 crawl backwards before resuming forward locomotion (Rankin et al., 1990). We quantified multiple  
650 mechanosensory sensitivity and habituation learning phenotypes from these reversals which we  
651 have previously shown are mediated by genetically dissociable underlying mechanisms. After the  
652 30<sup>th</sup> stimulus, a 5 min rest period occurred which was followed by the administration of a final  
653 stimulus to assess short-term memory retention of habituation (spontaneous recovery, **Fig. 1D**).  
654 See The Multi-Worm Tracker user guide (<https://sourceforge.net/projects/mwt/>) or McDiarmid *et*  
655 *al.* 2020 (McDiarmid et al., 2020) for full description of all phenotypes. All testing occurred in a  
656 temperature and humidity-controlled room at approximately 20°C.

657

658 We used the MWT software (version 1.2.0.2) to delivery stimuli and acquire images  
659 (Swierczek et al., 2011), and Choreography software (version 1.3.0\_r103552) to quantify  
660 phenotypes. Choreography filters “-shadowless”, “-minimum-move-body 2”, and “-minimum-  
661 time 20” were used to restrict analysis to animals that moved more than 2 body lengths and were  
662 tracked for 20 secs or longer. The “MeasureReversal” plug-in was used to identify animals that  
663 reversed within 1 sec of the mechanosensory stimulus being administered (Swierczek et al.,  
664 2011). Choreography output files were organized using custom R scripts which are freely  
665 available at [Github link will be inserted here]. All phenotypic features were pooled across the 4-

666 6 plate replicates (each plate replicate capturing 40-100 animals) per strain. The mean of each  
667 condition was then compared using an unpaired t-test and Benjamini-Hochberg control of false  
668 discovery rate at 0.01. Figures were generated using the ggplot2 package in R (Wickham, 2016).

669

## 670 **Strains used**

671 The following strains are available through the *Caenorhabditis Genetics Center* (CGC):

672 CA1200 *ieSi57[eft-3p::TIR1::mRuby::unc-54 3'UTR + cbr-unc-119(+)] II*

673

674 OH13988 *ieSi57[eft-3p::TIR1::mRuby::unc-54 3'UTR + cbr-unc-119(+)] II;*  
675 *unc-3(ot837[unc-3::mNeonGreen::AID]) X*

676

677 OH15227 *unc-86(ot893[unc-86::3xFlag::mNeonGreen::AID]) III*

678

679 CA1207 *dhc-1(ie28[dhc-1::degron::GFP]) I*

680

681 CA1210 *ieSi57[eft-3p::TIR1::mRuby::unc-54 3'UTR + cbr-unc-119(+)] II; dhc-1(ie28[dhc-*  
682 *1::degron::GFP]) I*

683

684 The following strains were generated using standard genetic crosses:

685 VG937 *ieSi57[eft-3p::TIR1::mRuby::unc-54 3'UTR + cbr-unc-119(+)] II; unc-86(ot893[unc-*  
686 *86::3xFlag::mNeonGreen::AID]) III*

687

688 VG946 *mizSi6[rab-3p::TIR1::unc-54 3'UTR + LoxP pmyo-2::GFP::unc-54 3'UTR*  
689 *prps27::NeoR::unc-54 3'UTR LoxP] V; dhc-1(ie28[dhc-1::degron::GFP]) I*

690

## 691 **Genotype confirmation**

692 Successful crosses were determined through visual confirmation of fluorescent reporters  
693 as well as PCR-based genotyping using the following primers:

694

695 *TIR1* sequence

696 Forward: GACCGTAACTCCGTCTCC

697 Reverse: CGTTGGTGGTGATGATTTGAC

698 AID degron sequence

699 Forward: CCTAAAGATCCAGCCAAACC



700 Reverse: CTTACGAACGCCGC  
701  
702 or  
703  
704 Forward: GATCCAGCCAAACCTCCGGC  
705 Reverse: CTTACGAACGCCGCCGC  
706

## 707 **ACKNOWLEDGEMENTS**

708 The authors thank Dr. Kota Mizumoto for the *rab-3p::TIR1* strain that was used for neuron-  
709 specific degradation and the CGC (funded by National Institute of Health Office of Research  
710 Infrastructure Programs, P40 OD010440) for other strains used within this research.

711

## 712 **COMPETING INTERESTS**

713 The authors declare no competing interests.

714

## 715 **AUTHOR CONTRIBUTIONS**

716 Conceptualization: T.A.M and L.D.K. Methodology: T.A.M. Software and formal analysis:  
717 T.A.M. Investigation: L.D.K and T.A.M. Data curation: T.A.M. Writing-original draft preparation:  
718 L.D.K. and T.A.M. Writing- review and editing L.D.K, T.A.M, and C.H.R. Visualization: T.A.M. and  
719 L.D.K. Supervision: C.H.R. Funding acquisition: C.H.R.

720

## 721 **FUNDING**

722 This project was supported by a Canadian Institutes of Health Research (CIHR) Doctoral  
723 Research Award to L.D.K; a Canadian Institutes of Health Research (CIHR) Doctoral Research  
724 Award to T.A.M.; and a CIHR project grant (CIHR MOP PJT-165947) to C.H.R.

725

## 726 **REFERENCES**

727 Abrahams, B.S., Arking, D.E., Campbell, D.B., Mefford, H.C., Morrow, E.M., Weiss, L.A.,  
728 Menashe, I., Wadkins, T., Banerjee-Basu, S., Packer, A., 2013. SFARI Gene 2.0: a

729 community-driven knowledgebase for the autism spectrum disorders (ASDs). *Mol. Autism*  
730 4, 36. <https://doi.org/10.1186/2040-2392-4-36>

731 Agapite, J., Albou, L.-P., Aleksander, S., Argasinska, J., Arnaboldi, V., Attrill, H., Bello, S.M.,  
732 Blake, J.A., Blodgett, O., Bradford, Y.M., Bult, C.J., Cain, S., Calvi, B.R., Carbon, S., Chan,  
733 J., Chen, W.J., Cherry, J.M., Cho, J., Christie, K.R., Crosby, M.A., Pons, J. De, Dolan,  
734 M.E., Santos, G. dos, Dunn, B., Dunn, N., Eagle, A., Ebert, D., Engel, S.R., Fashena, D.,  
735 Frazer, K., Gao, S., Gondwe, F., Goodman, J., Gramates, L.S., Grove, C.A., Harris, T.,  
736 Harrison, M.-C., Howe, D.G., Howe, K.L., Jha, S., Kadin, J.A., Kaufman, T.C., Kalita, P.,  
737 Karra, K., Kishore, R., Laulederkind, S., Lee, R., MacPherson, K.A., Marygold, S.J.,  
738 Matthews, B., Millburn, G., Miyasato, S., Moxon, S., Mueller, H.-M., Mungall, C.,  
739 Muruganujan, A., Mushayahama, T., Nash, R.S., Ng, P., Paulini, M., Perrimon, N., Pich, C.,  
740 Raciti, D., Richardson, J.E., Russell, M., Gelbart, S.R., Ruzicka, L., Schaper, K.,  
741 Shimoyama, M., Simison, M., Smith, C., Shaw, D.R., Shrivatsav, A., Skrzypek, M., Smith,  
742 J.R., Sternberg, P.W., Tabone, C.J., Thomas, P.D., Thota, J., Toro, S., Tomczuk, M., Tutaj,  
743 Marek, Tutaj, Monika, Urbano, J.-M., Auken, K. Van, Slyke, C.E. Van, Wang, S.-J., Weng,  
744 S., Westerfield, M., Williams, G., Wong, E.D., Wright, A., Yook, K., 2020. Alliance of  
745 Genome Resources Portal: unified model organism research platform. *Nucleic Acids Res.*  
746 48, D650–D658. <https://doi.org/10.1093/nar/gkz813>

747 American Psychiatric Association, 2013. *Diagnostic and Statistical Manual of Mental Disorders*.  
748 American Psychiatric Association. <https://doi.org/10.1176/appi.books.9780890425596>

749 Ardiel, E.L., McDiarmid, T.A., Timbers, T.A., Lee, K.C.Y., Safaei, J., Pelech, S.L., Rankin, C.H.,  
750 2018. Insights into the roles of CMK-1 and OGT-1 in interstimulus interval-dependent  
751 habituation in *Caenorhabditis elegans*. *Proc. R. Soc. B Biol. Sci.* 285.  
752 <https://doi.org/10.1098/rspb.2018.2084>

753 Ashley, G.E., Duong, T., Levenson, M.T., Martinez, M.A.Q., Johnson, L.C., Hibshman, J.D.,  
754 Saeger, H.N., Palmisano, N.J., Doonan, R., Martinez-Mendez, R., Davidson, B.R., Zhang,

755 W., Ragle, J.M., Medwig-Kinney, T.N., Sirota, S.S., Goldstein, B., Matus, D.Q., Dickinson,  
756 D.J., Reiner, D.J., Ward, J.D., 2021. An expanded auxin-inducible degron toolkit for  
757 *Caenorhabditis elegans*. *Genetics* 217. <https://doi.org/10.1093/genetics/iyab006>  
758 Au, V., Li-Leger, E., Raymant, G., Flibotte, S., Chen, G., Martin, K., Fernando, L., Doell, C.,  
759 Rosell, F.I., Wang, S., Edgley, M.L., Rougvie, A.E., Hutter, H., Moerman, D.G., 2019.  
760 CRISPR/Cas9 Methodology for the Generation of Knockout Deletions in *Caenorhabditis*  
761 *elegans*. *G3&#58; Genes|Genomes|Genetics* 9, 135–144.  
762 <https://doi.org/10.1534/g3.118.200778>  
763 Badea, T.C., Cahill, H., Ecker, J., Hattar, S., Nathans, J., 2009. Distinct Roles of Transcription  
764 Factors Brn3a and Brn3b in Controlling the Development, Morphology, and Function of  
765 Retinal Ganglion Cells. *Neuron* 61, 852–864. <https://doi.org/10.1016/j.neuron.2009.01.020>  
766 Beck, C.D.O., Rankin, C.H., 1993. Effects of aging on habituation in the nematode  
767 *Caenorhabditis elegans*. *Behav. Processes* 28, 145–163. [https://doi.org/10.1016/0376-](https://doi.org/10.1016/0376-6357(93)90088-9)  
768 [6357\(93\)90088-9](https://doi.org/10.1016/0376-6357(93)90088-9)  
769 Belmadani, M., Jacobson, M., Holmes, N., Phan, M., Nguyen, T., Pavlidis, P., Rogic, S., 2019.  
770 VariCarta: A Comprehensive Database of Harmonized Genomic Variants Found in Autism  
771 Spectrum Disorder Sequencing Studies. *Autism Res.* 12, 1728–1736.  
772 <https://doi.org/10.1002/aur.2236>  
773 Boyle, C.A., Boulet, S., Schieve, L.A., Cohen, R.A., Blumberg, S.J., Yeargin-Allsopp, M., Visser,  
774 S., Kogan, M.D., 2011. Trends in the Prevalence of Developmental Disabilities in US  
775 Children, 1997-2008. *Pediatrics* 127, 1034–1042. <https://doi.org/10.1542/peds.2010-2989>  
776 Brenner, S., 1974. The genetics of *Caenorhabditis elegans*. *Genetics* 77, 71–94.  
777 Chao, H.-T., Davids, M., Burke, E., Pappas, J.G., Rosenfeld, J.A., McCarty, A.J., Davis, T.,  
778 Wolfe, L., Toro, C., Tiffit, C., Xia, F., Stong, N., Johnson, T.K., Warr, C.G., Yamamoto, S.,  
779 Adams, D.R., Markello, T.C., Gahl, W.A., Bellen, H.J., Wangler, M.F., Malicdan, M.C. V.,  
780 Adams, D.R., Adams, C.J., Alejandro, M.E., Allard, P., Ashley, E.A., Bacino, C.A.,

781 Balasubramanyam, A., Barseghyan, H., Beggs, A.H., Bellen, H.J., Bernstein, J.A., Bick,  
782 D.P., Birch, C.L., Boone, B.E., Briere, L.C., Brown, D.M., Brush, M., Burrage, L.C., Chao,  
783 K.R., Clark, G.D., Cogan, J.D., Cooper, C.M., Craigen, W.J., Davids, M., Dayal, J.G.,  
784 Dell'Angelica, E.C., Dhar, S.U., Dipple, K.M., Donnell-Fink, L.A., Dorrani, N., Dorset, D.C.,  
785 Draper, D.D., Dries, A.M., Eckstein, D.J., Emrick, L.T., Eng, C.M., Esteves, C., Estwick, T.,  
786 Fisher, P.G., Frisby, T.S., Frost, K., Gahl, W.A., Gartner, V., Godfrey, R.A., Goheen, M.,  
787 Golas, G.A., Goldstein, D.B., Gordon, M. "Gracie" G., Gould, S.E., Gourdine, J.-P.F.,  
788 Graham, B.H., Groden, C.A., Gropman, A.L., Hackbarth, M.E., Haendel, M., Hamid, R.,  
789 Hanchard, N.A., Handley, L.H., Hardee, I., Herzog, M.R., Holm, I.A., Howerton, E.M.,  
790 Jacob, H.J., Jain, M., Jiang, Y., Johnston, J.M., Jones, A.L., Koehler, A.E., Koeller, D.M.,  
791 Kohane, I.S., Kohler, J.N., Krasnewich, D.M., Krieg, E.L., Krier, J.B., Kyle, J.E., Lalani,  
792 S.R., Latham, L., Latour, Y.L., Lau, C.C., Lazar, J., Lee, B.H., Lee, H., Lee, P.R., Levy,  
793 S.E., Levy, D.J., Lewis, R.A., Liebendorder, A.P., Lincoln, S.A., Loomis, C.R., Loscalzo, J.,  
794 Maas, R.L., Macnamara, E.F., MacRae, C.A., Maduro, V. V., Malicdan, M.C. V.,  
795 Mamounas, L.A., Manolio, T.A., Markello, T.C., Mashid, A.S., Mazur, P., McCarty, A.J.,  
796 McConkie-Rosell, A., McCray, A.T., Metz, T.O., Might, M., Moretti, P.M., Mulvihill, J.J.,  
797 Murphy, J.L., Muzny, D.M., Nehrebecky, M.E., Nelson, S.F., Newberry, J.S., Newman,  
798 J.H., Nicholas, S.K., Novacic, D., Orange, J.S., Pallais, J.C., Palmer, C.G.S., Papp, J.C.,  
799 Pena, L.D.M., Phillips, J.A., Posey, J.E., Postlethwait, J.H., Potocki, L., Pusey, B.N.,  
800 Ramoni, R.B., Rodan, L.H., Sadozai, S., Schaffer, K.E., Schoch, K., Schroeder, M.C.,  
801 Scott, D.A., Sharma, P., Shashi, V., Silverman, E.K., Sinsheimer, J.S., Soldatos, A.G.,  
802 Spillmann, R.C., Splinter, K., Stoler, J.M., Stong, N., Strong, K.A., Sullivan, J.A., Sweetser,  
803 D.A., Thomas, S.P., Tift, C.J., Tolman, N.J., Toro, C., Tran, A.A., Valivullah, Z.M., Vilain,  
804 E., Waggott, D.M., Wahl, C.E., Walley, N.M., Walsh, C.A., Wangler, M.F., Warburton, M.,  
805 Ward, P.A., Waters, K.M., Webb-Robertson, B.-J.M., Weech, A.A., Westerfield, M.,  
806 Wheeler, M.T., Wise, A.L., Worthe, L.A., Worthey, E.A., Yamamoto, S., Yang, Y., Yu, G.,

- 807 Zornio, P.A., 2017. A Syndromic Neurodevelopmental Disorder Caused by De Novo  
808 Variants in EBF3. *Am. J. Hum. Genet.* 100, 128–137.  
809 <https://doi.org/10.1016/j.ajhg.2016.11.018>
- 810 Cianfrocco, M.A., DeSantis, M.E., Leschziner, A.E., Reck-Peterson, S.L., 2015. Mechanism and  
811 Regulation of Cytoplasmic Dynein. *Annu. Rev. Cell Dev. Biol.* 31, 83–108.  
812 <https://doi.org/10.1146/annurev-cellbio-100814-125438>
- 813 Creson, T.K., Rojas, C., Hwaun, E., Vaissiere, T., Kilinc, M., Jimenez-Gomez, A., Holder, J.L.,  
814 Tang, J., Colgin, L.L., Miller, C.A., Rumbaugh, G., 2019. Re-expression of SynGAP protein  
815 in adulthood improves translatable measures of brain function and behavior. *Elife* 8.  
816 <https://doi.org/10.7554/eLife.46752>
- 817 de la Torre-Ubieta, L., Won, H., Stein, J.L., Geschwind, D.H., 2016. Advancing the  
818 understanding of autism disease mechanisms through genetics. *Nat. Med.* 22, 345–361.  
819 <https://doi.org/10.1038/nm.4071>
- 820 De Rubeis, S., He, X., Goldberg, A.P., Poultney, C.S., Samocha, K., Ercument Cicek, A., Kou,  
821 Y., Liu, L., Fromer, M., Walker, S., Singh, T., Klei, L., Kosmicki, J., Fu, S.-C., Aleksic, B.,  
822 Biscaldi, M., Bolton, P.F., Brownfeld, J.M., Cai, J., Campbell, N.G., Carracedo, A.,  
823 Chahrour, M.H., Chiocchetti, A.G., Coon, H., Crawford, E.L., Crooks, L., Curran, S.R.,  
824 Dawson, G., Duketis, E., Fernandez, B.A., Gallagher, L., Geller, E., Guter, S.J., Sean Hill,  
825 R., Ionita-Laza, I., Jimenez Gonzalez, P., Kilpinen, H., Klauck, S.M., Kolevzon, A., Lee, I.,  
826 Lei, J., Lehtimäki, T., Lin, C.-F., Ma'ayan, A., Marshall, C.R., McInnes, A.L., Neale, B.,  
827 Owen, M.J., Ozaki, N., Parellada, M., Parr, J.R., Purcell, S., Puura, K., Rajagopalan, D.,  
828 Rehnström, K., Reichenberg, A., Sabo, A., Sachse, M., Sanders, S.J., Schafer, C.,  
829 Schulte-Rüther, M., Skuse, D., Stevens, C., Szatmari, P., Tammimies, K., Valladares, O.,  
830 Voran, A., Wang, L.-S., Weiss, L.A., Jeremy Willsey, A., Yu, T.W., Yuen, R.K.C., Cook,  
831 E.H., Freitag, C.M., Gill, M., Hultman, C.M., Lehner, T., Palotie, A., Schellenberg, G.D.,  
832 Sklar, P., State, M.W., Sutcliffe, J.S., Walsh, C.A., Scherer, S.W., Zwick, M.E., Barrett,

- 833 J.C., Cutler, D.J., Roeder, K., Devlin, B., Daly, M.J., Buxbaum, J.D., 2014. Synaptic,  
834 transcriptional and chromatin genes disrupted in autism. *Nature* 515, 209–215.  
835 <https://doi.org/10.1038/nature13772>
- 836 Deciphering Developmental Disorders Study, 2015. Large-scale discovery of novel genetic  
837 causes of developmental disorders. *Nature* 519, 223–228.  
838 <https://doi.org/10.1038/nature14135>
- 839 Dickinson, D.J., Goldstein, B., 2016. CRISPR-Based Methods for *Caenorhabditis elegans*  
840 Genome Engineering. *Genetics* 202, 885–901.  
841 <https://doi.org/10.1534/genetics.115.182162>
- 842 Ehninger, D., Li, W., Fox, K., Stryker, M.P., Silva, A.J., 2008. Reversing Neurodevelopmental  
843 Disorders in Adults. *Neuron* 60, 950–960. <https://doi.org/10.1016/j.neuron.2008.12.007>
- 844 Fenckova, M., Blok, L.E.R., Asztalos, L., Goodman, D.P., Cizek, P., Singgih, E.L., Glennon,  
845 J.C., IntHout, J., Zweier, C., Eichler, E.E., von Reyn, C.R., Bernier, R.A., Asztalos, Z.,  
846 Schenck, A., 2019. Habituation Learning is a Widely Affected Mechanism in *Drosophila*  
847 Models of Intellectual Disability and Autism Spectrum Disorders. *Biol. Psychiatry*.  
848 <https://doi.org/10.1016/j.biopsych.2019.04.029>
- 849 Feng, W., Li, Y., Dao, P., Aburas, J., Islam, P., Elbaz, B., Kolarzyk, A., Brown, A.E., Kratsios, P.,  
850 2020. A terminal selector prevents a Hox transcriptional switch to safeguard motor neuron  
851 identity throughout life. *Elife* 9. <https://doi.org/10.7554/eLife.50065>
- 852 Gao, Y., Irvine, E.E., Eleftheriadou, I., Naranjo, C.J., Hearn-Yeates, F., Bosch, L., Glegola, J.A.,  
853 Murdoch, L., Czerniak, A., Meloni, I., Renieri, A., Kinali, M., Mazarakis, N.D., 2020. Gene  
854 replacement ameliorates deficits in mouse and human models of cyclin-dependent kinase-  
855 like 5 disorder. *Brain* 143, 811–832. <https://doi.org/10.1093/brain/awaa028>
- 856 Green, S.A., Hernandez, L., Lawrence, K.E., Liu, J., Tsang, T., Yeargin, J., Cummings, K.,  
857 Laugeson, E., Dapretto, M., Bookheimer, S.Y., 2019. Distinct Patterns of Neural  
858 Habituation and Generalization in Children and Adolescents With Autism With Low and

- 859 High Sensory Overresponsivity. *Am. J. Psychiatry* 176, 1010–1020.  
860 <https://doi.org/10.1176/appi.ajp.2019.18121333>
- 861 Green, S.A., Hernandez, L., Tottenham, N., Krasileva, K., Bookheimer, S.Y., Dapretto, M.,  
862 2015. Neurobiology of Sensory Overresponsivity in Youth With Autism Spectrum  
863 Disorders. *JAMA Psychiatry* 72, 778. <https://doi.org/10.1001/jamapsychiatry.2015.0737>
- 864 Guy, J., Gan, J., Selfridge, J., Cobb, S., Bird, A., 2007. Reversal of Neurological Defects in a  
865 Mouse Model of Rett Syndrome. *Science* (80-. ). 315, 1143–1147.  
866 <https://doi.org/10.1126/science.1138389>
- 867 Hamill, D.R., Severson, A.F., Carter, J.C., Bowerman, B., 2002. Centrosome Maturation and  
868 Mitotic Spindle Assembly in *C. elegans* Require SPD-5, a Protein with Multiple Coiled-Coil  
869 Domains. *Dev. Cell* 3, 673–684. [https://doi.org/10.1016/S1534-5807\(02\)00327-1](https://doi.org/10.1016/S1534-5807(02)00327-1)
- 870 Harada, A., Takei, Y., Kanai, Y., Tanaka, Y., Nonaka, S., Hirokawa, N., 1998. Golgi Vesiculation  
871 and Lysosome Dispersion in Cells Lacking Cytoplasmic Dynein. *J. Cell Biol.* 141, 51–59.  
872 <https://doi.org/10.1083/jcb.141.1.51>
- 873 Howell, A.M., Rose, A.M., 1990. Essential genes in the hDf6 region of chromosome I in  
874 *Caenorhabditis elegans*. *Genetics* 126, 583–92.
- 875 Huang, E.J., Liu, W., Fritsch, B., Bianchi, L.M., Reichardt, L.F., Xiang, M., 2001. Brn3a is a  
876 transcriptional regulator of soma size, target field innervation and axon pathfinding of inner  
877 ear sensory neurons. *Development* 128, 2421–32.
- 878 Husson, Steven J. , Steuer Costa, Wagner., Schmitt, Cornelia., Gottschalk, A., 2012. Keeping  
879 track of worm trackers (September 10, 2012), in: *The C. elegans Research Community*  
880 (Ed.), *WormBook*. <https://doi.org/doi/10.1895/wormbook.1.150.1>
- 881 Iakoucheva, L.M., Muotri, A.R., Sebat, J., 2019. Getting to the Cores of Autism. *Cell* 178, 1287–  
882 1298. <https://doi.org/10.1016/j.cell.2019.07.037>
- 883 Iossifov, I., O’Roak, B.J., Sanders, S.J., Ronemus, M., Krumm, N., Levy, D., Stessman, H.A.,  
884 Witherspoon, K.T., Vives, L., Patterson, K.E., Smith, J.D., Paepers, B., Nickerson, D.A.,

885 Dea, J., Dong, S., Gonzalez, L.E., Mandell, J.D., Mane, S.M., Murtha, M.T., Sullivan, C.A.,  
886 Walker, M.F., Waqar, Z., Wei, L., Willsey, A.J., Yamrom, B., Lee, Y., Grabowska, E.,  
887 Dalkic, E., Wang, Z., Marks, S., Andrews, P., Leotta, A., Kendall, J., Hakker, I.,  
888 Rosenbaum, J., Ma, B., Rodgers, L., Troge, J., Narzisi, G., Yoon, S., Schatz, M.C., Ye, K.,  
889 McCombie, W.R., Shendure, J., Eichler, E.E., State, M.W., Wigler, M., 2014. The  
890 contribution of de novo coding mutations to autism spectrum disorder. *Nature* 515, 216–  
891 221. <https://doi.org/10.1038/nature13908>

892 Jin, X., Simmons, S.K., Guo, A., Shetty, A.S., Ko, M., Nguyen, L., Jokhi, V., Robinson, E., Oyler,  
893 P., Curry, N., Deangeli, G., Lodato, S., Levin, J.Z., Regev, A., Zhang, F., Arlotta, P., 2020.  
894 In vivo Perturb-Seq reveals neuronal and glial abnormalities associated with autism risk  
895 genes. *Science* (80-. ). 370, eaaz6063. <https://doi.org/10.1126/science.aaz6063>

896 Kaletta, T., Hengartner, M.O., 2006. Finding function in novel targets: *C. elegans* as a model  
897 organism. *Nat. Rev. Drug Discov.* 5, 387–399. <https://doi.org/10.1038/nrd2031>

898 Kavšek, M., 2004. Predicting later IQ from infant visual habituation and dishabituation: A meta-  
899 analysis. *J. Appl. Dev. Psychol.* 25, 369–393. <https://doi.org/10.1016/j.appdev.2004.04.006>

900 Kepler, L.D., McDiarmid, T.A., Rankin, C.H., 2020. Habituation in high-throughput genetic model  
901 organisms as a tool to investigate the mechanisms of neurodevelopmental disorders.  
902 *Neurobiol. Learn. Mem.* 171, 107208. <https://doi.org/10.1016/j.nlm.2020.107208>

903 Kim, W., Underwood, R.S., Greenwald, I., Shaye, D.D., 2018. OrthoList 2: A New Comparative  
904 Genomic Analysis of Human and *Caenorhabditis elegans* Genes. *Genetics* 210, 445–461.  
905 <https://doi.org/10.1534/genetics.118.301307>

906 Kindt, K.S., Quast, K.B., Giles, A.C., De, S., Hendrey, D., Nicastro, I., Rankin, C.H., Schafer,  
907 W.R., 2007. Dopamine Mediates Context-Dependent Modulation of Sensory Plasticity in *C.*  
908 *elegans*. *Neuron* 55, 662–676. <https://doi.org/10.1016/j.neuron.2007.07.023>

909 Kleinhans, N.M., Johnson, L.C., Richards, T., Mahurin, R., Greenson, J., Dawson, G., Aylward,  
910 E., 2009. Reduced Neural Habituation in the Amygdala and Social Impairments in Autism



- 911 Spectrum Disorders. *Am. J. Psychiatry* 166, 467–475.  
912 <https://doi.org/10.1176/appi.ajp.2008.07101681>
- 913 Kratsios, P., Kerk, S.Y., Catela, C., Liang, J., Vidal, B., Bayer, E.A., Feng, W., De La Cruz, E.D.,  
914 Croci, L., Consalez, G.G., Mizumoto, K., Hobert, O., 2017. An intersectional gene  
915 regulatory strategy defines subclass diversity of *C. elegans* motor neurons. *Elife* 6.  
916 <https://doi.org/10.7554/eLife.25751>
- 917 Levitan, D., Doyle, T.G., Brousseau, D., Lee, M.K., Thinakaran, G., Slunt, H.H., Sisodia, S.S.,  
918 Greenwald, I., 1996. Assessment of normal and mutant human presenilin function in  
919 *Caenorhabditis elegans*. *Proc. Natl. Acad. Sci.* 93, 14940–14944.  
920 <https://doi.org/10.1073/pnas.93.25.14940>
- 921 Li, Y., Osuma, A., Correa, E., Okebalama, M.A., Dao, P., Gaylord, O., Aburas, J., Islam, P.,  
922 Brown, A.E., Kratsios, P., 2020. Establishment and maintenance of motor neuron identity  
923 via temporal modularity in terminal selector function. *Elife* 9.  
924 <https://doi.org/10.7554/eLife.59464>
- 925 Lopes, F., Soares, G., Gonçalves-Rocha, M., Pinto-Basto, J., Maciel, P., 2017. Whole Gene  
926 Deletion of EBF3 Supporting Haploinsufficiency of This Gene as a Mechanism of  
927 Neurodevelopmental Disease. *Front. Genet.* 8. <https://doi.org/10.3389/fgene.2017.00143>
- 928 Mains, P.E., Sulston, I.A., Wood, W.B., 1990. Dominant maternal-effect mutations causing  
929 embryonic lethality in *Caenorhabditis elegans*. *Genetics* 125, 351–69.
- 930 Massa, J., O’Desky, I.H., 2012. Impaired Visual Habituation in Adults With ADHD. *J. Atten.*  
931 *Disord.* 16, 553–561. <https://doi.org/10.1177/1087054711423621>
- 932 McDiarmid, T. A., Au, V., Loewen, A.D., Liang, J., Mizumoto, K., Moerman, D.G., Rankin, C.H.,  
933 2018. CRISPR-Cas9 human gene replacement and phenomic characterization in  
934 *Caenorhabditis elegans* to understand the functional conservation of human genes and  
935 decipher variants of uncertain significance. *Dis. Model. Mech.* 11.  
936 <https://doi.org/10.1242/dmm.036517>

- 937 McDiarmid, T. A., Belmadani, M., Liang, J., Meili, F., Mathews, E.A., Mullen, G.P., Hendi, A.,  
938 Wong, W.-R., Rand, J.B., Mizumoto, K., Haas, K., Pavlidis, P., Rankin, C.H., 2020.  
939 Systematic phenomics analysis of autism-associated genes reveals parallel networks  
940 underlying reversible impairments in habituation. *Proc. Natl. Acad. Sci.* 117, 656–667.  
941 <https://doi.org/10.1073/pnas.1912049116>
- 942 McDiarmid, T.A., Bernardos, A.C., Rankin, C.H., 2017. Habituation is altered in neuropsychiatric  
943 disorders—A comprehensive review with recommendations for experimental design and  
944 analysis. *Neurosci. Biobehav. Rev.* 80, 286–305.  
945 <https://doi.org/10.1016/j.neubiorev.2017.05.028>
- 946 McDiarmid, T.A., Kepler, L.D., Rankin, C.H., 2020. Auxin does not affect a suite of morphological  
947 or behavioral phenotypes in two wild-type *C. elegans* strains. *microPublication Biol.* 2020.  
948 <https://doi.org/10.17912/micropub.biology.000307>
- 949 McDiarmid, T.A., Yu, A.J., Rankin, C.H., 2019. Habituation Is More Than Learning to Ignore:  
950 Multiple Mechanisms Serve to Facilitate Shifts in Behavioral Strategy. *BioEssays* 41,  
951 1900077. <https://doi.org/10.1002/bies.201900077>
- 952 McDiarmid, T. A., Yu, A.J., Rankin, C.H., 2018. Beyond the response-High throughput  
953 behavioral analyses to link genome to phenome in *Caenorhabditis elegans*. *Genes, Brain*  
954 *Behav.* 17, e12437. <https://doi.org/10.1111/gbb.12437>
- 955 Mei, Y., Monteiro, P., Zhou, Y., Kim, J.-A., Gao, X., Fu, Z., Feng, G., 2016. Adult restoration of  
956 Shank3 expression rescues selective autistic-like phenotypes. *Nature* 530, 481–484.  
957 <https://doi.org/10.1038/nature16971>
- 958 Nance, J., Frøkjær-Jensen, C., 2019. The *Caenorhabditis elegans* Transgenic Toolbox.  
959 *Genetics* 212, 959–990. <https://doi.org/10.1534/genetics.119.301506>
- 960 Nishimura, K., Fukagawa, T., Takisawa, H., Kakimoto, T., Kanemaki, M., 2009. An auxin-based  
961 degron system for the rapid depletion of proteins in nonplant cells. *Nat. Methods* 6, 917–  
962 22. <https://doi.org/10.1038/nmeth.1401>

- 963 Parikshak, N.N., Luo, R., Zhang, A., Won, H., Lowe, J.K., Chandran, V., Horvath, S.,  
964 Geschwind, D.H., 2013. Integrative Functional Genomic Analyses Implicate Specific  
965 Molecular Pathways and Circuits in Autism. *Cell* 155, 1008–1021.  
966 <https://doi.org/10.1016/j.cell.2013.10.031>
- 967 Post, K.L., Belmadani, M., Ganguly, P., Meili, F., Dingwall, R., McDiarmid, T.A., Meyers, W.M.,  
968 Herrington, C., Young, B.P., Callaghan, D.B., Rogic, S., Edwards, M., Niciforovic, A., Cau,  
969 A., Rankin, C.H., O'Connor, T.P., Bamji, S.X., Loewen, C.J.R., Allan, D.W., Pavlidis, P.,  
970 Haas, K., 2020. Multi-model functionalization of disease-associated PTEN missense  
971 mutations identifies multiple molecular mechanisms underlying protein dysfunction. *Nat.*  
972 *Commun.* 11, 2073. <https://doi.org/10.1038/s41467-020-15943-0>
- 973 Prasad, B., Karakuzu, O., Reed, R.R., Cameron, S., 2008. *unc-3*-dependent repression of  
974 specific motor neuron fates in *Caenorhabditis elegans*. *Dev. Biol.* 323, 207–215.  
975 <https://doi.org/10.1016/j.ydbio.2008.08.029>
- 976 Prasad, B.C., Ye, B., Zackhary, R., Schrader, K., Seydoux, G., Reed, R.R., 1998. *unc-3*, a gene  
977 required for axonal guidance in *Caenorhabditis elegans*, encodes a member of the O/E  
978 family of transcription factors. *Development* 125, 1561–8.
- 979 Rai, S., Rankin, C.H., 2007. Critical and sensitive periods for reversing the effects of  
980 mechanosensory deprivation on behavior, nervous system, and development  
981 in *Caenorhabditis elegans*. *Dev. Neurobiol.* 67, 1443–1456.  
982 <https://doi.org/10.1002/dneu.20522>
- 983 Randlett, O., Haesemeyer, M., Forkin, G., Shoenhard, H., Schier, A.F., Engert, F., Granato, M.,  
984 2019. Distributed Plasticity Drives Visual Habituation Learning in Larval Zebrafish. *Curr.*  
985 *Biol.* 29, 1337-1345.e4. <https://doi.org/10.1016/j.cub.2019.02.039>
- 986 Rankin, C.H., Abrams, T., Barry, R.J., Bhatnagar, S., Clayton, D.F., Colombo, J., Coppola, G.,  
987 Geyer, M.A., Glanzman, D.L., Marsland, S., McSweeney, F.K., Wilson, D.A., Wu, C.-F.,  
988 Thompson, R.F., 2009. Habituation revisited: An updated and revised description of the

- 989 behavioral characteristics of habituation. *Neurobiol. Learn. Mem.* 92, 135–138.  
990 <https://doi.org/10.1016/j.nlm.2008.09.012>
- 991 Rankin, C.H., Beck, C.D.O., Chiba, C.M., 1990. *Caenorhabditis elegans*: A new model system  
992 for the study of learning and memory. *Behav. Brain Res.* 37, 89–92.  
993 [https://doi.org/10.1016/0166-4328\(90\)90074-O](https://doi.org/10.1016/0166-4328(90)90074-O)
- 994 Robinson, J.T., Wojcik, E.J., Sanders, M.A., McGrail, M., Hays, T.S., 1999. Cytoplasmic dynein  
995 is required for the nuclear attachment and migration of centrosomes during mitosis in  
996 *Drosophila*. *J. Cell Biol.* 146, 597–608. <https://doi.org/10.1083/jcb.146.3.597>
- 997 Sanders, S.J., He, X., Willsey, A.J., Ercan-Sencicek, A.G., Samocha, K.E., Cicek, A.E., Murtha,  
998 M.T., Bal, V.H., Bishop, S.L., Dong, S., Goldberg, A.P., Jinlu, C., Keaney, J.F., Klei, L.,  
999 Mandell, J.D., Moreno-De-Luca, D., Poultney, C.S., Robinson, E.B., Smith, L., Solli-  
1000 Nowlan, T., Su, M.Y., Teran, N.A., Walker, M.F., Werling, D.M., Beaudet, A.L., Cantor,  
1001 R.M., Fombonne, E., Geschwind, D.H., Grice, D.E., Lord, C., Lowe, J.K., Mane, S.M.,  
1002 Martin, D.M., Morrow, E.M., Talkowski, M.E., Sutcliffe, J.S., Walsh, C.A., Yu, T.W.,  
1003 Ledbetter, D.H., Martin, C.L., Cook, E.H., Buxbaum, J.D., Daly, M.J., Devlin, B., Roeder,  
1004 K., State, M.W., 2015. Insights into Autism Spectrum Disorder Genomic Architecture and  
1005 Biology from 71 Risk Loci. *Neuron* 87, 1215–1233.  
1006 <https://doi.org/10.1016/j.neuron.2015.09.016>
- 1007 Sanders, S.J., Sahin, M., Hostyk, J., Thurm, A., Jacquemont, S., Avillach, P., Douard, E.,  
1008 Martin, C.L., Modi, M.E., Moreno-De-Luca, A., Raznahan, A., Anticevic, A., Dolmetsch, R.,  
1009 Feng, G., Geschwind, D.H., Glahn, D.C., Goldstein, D.B., Ledbetter, D.H., Mulle, J.G.,  
1010 Pasca, S.P., Samaco, R., Sebat, J., Pariser, A., Lehner, T., Gur, R.E., Bearden, C.E.,  
1011 2019. A framework for the investigation of rare genetic disorders in neuropsychiatry. *Nat.*  
1012 *Med.* 25, 1477–1487. <https://doi.org/10.1038/s41591-019-0581-5>
- 1013 Satterstrom, F.K., Kosmicki, J.A., Wang, J., Breen, M.S., De Rubeis, S., An, J.-Y., Peng, M.,  
1014 Collins, R., Grove, J., Klei, L., Stevens, C., Reichert, J., Mulhern, M.S., Artomov, M.,

1015 Gerges, S., Sheppard, B., Xu, X., Bhaduri, A., Norman, U., Brand, H., Schwartz, G.,  
1016 Nguyen, R., Guerrero, E.E., Dias, C., Betancur, C., Cook, E.H., Gallagher, L., Gill, M.,  
1017 Sutcliffe, J.S., Thurm, A., Zwick, M.E., Børglum, A.D., State, M.W., Cicek, A.E., Talkowski,  
1018 M.E., Cutler, D.J., Devlin, B., Sanders, S.J., Roeder, K., Daly, M.J., Buxbaum, J.D.,  
1019 Aleksic, B., Anney, R., Barbosa, M., Bishop, S., Brusco, A., Bybjerg-Grauholm, J.,  
1020 Carracedo, A., Chan, M.C.Y., Chiocchetti, A.G., Chung, B.H.Y., Coon, H., Cuccaro, M.L.,  
1021 Curró, A., Dalla Bernardina, B., Doan, R., Domenici, E., Dong, S., Fallerini, C., Fernández-  
1022 Prieto, M., Ferrero, G.B., Freitag, C.M., Fromer, M., Gargus, J.J., Geschwind, D., Giorgio,  
1023 E., González-Peñas, J., Guter, S., Halpern, D., Hansen-Kiss, E., He, X., Herman, G.E.,  
1024 Hertz-Picciotto, I., Hougaard, D.M., Hultman, C.M., Ionita-Laza, I., Jacob, S., Jamison, J.,  
1025 Jugessur, A., Kaartinen, M., Knudsen, G.P., Klevzon, A., Kushima, I., Lee, S.L.,  
1026 Lehtimäki, T., Lim, E.T., Lintas, C., Lipkin, W.I., Lopergolo, D., Lopes, F., Ludena, Y.,  
1027 Maciel, P., Magnus, P., Mahjani, B., Maltman, N., Manoach, D.S., Meiri, G., Menashe, I.,  
1028 Miller, J., Minshew, N., Montenegro, E.M.S., Moreira, D., Morrow, E.M., Mors, O.,  
1029 Mortensen, P.B., Mosconi, M., Muglia, P., Neale, B.M., Nordentoft, M., Ozaki, N., Palotie,  
1030 A., Parellada, M., Passos-Bueno, M.R., Pericak-Vance, M., Persico, A.M., Pessah, I.,  
1031 Puura, K., Reichenberg, A., Renieri, A., Riberi, E., Robinson, E.B., Samocha, K.E., Sandin,  
1032 S., Santangelo, S.L., Schellenberg, G., Scherer, S.W., Schlitt, S., Schmidt, R., Schmitt, L.,  
1033 Silva, I.M.W., Singh, T., Siper, P.M., Smith, M., Soares, G., Stoltenberg, C., Suren, P.,  
1034 Susser, E., Sweeney, J., Szatmari, P., Tang, L., Tassone, F., Teufel, K., Trabetti, E.,  
1035 Trelles, M. del P., Walsh, C.A., Weiss, L.A., Werge, T., Werling, D.M., Wigdor, E.M.,  
1036 Wilkinson, E., Willsey, A.J., Yu, T.W., Yu, M.H.C., Yuen, R., Zachi, E., Agerbo, E., Als,  
1037 T.D., Appadurai, V., Bækvad-Hansen, M., Belliveau, R., Buil, A., Carey, C.E., Cerrato, F.,  
1038 Chambert, K., Churchhouse, C., Dalsgaard, S., Demontis, D., Dumont, A., Goldstein, J.,  
1039 Hansen, C.S., Hauberg, M.E., Hollegaard, M. V., Howrigan, D.P., Huang, H., Maller, J.,  
1040 Martin, A.R., Martin, J., Mattheisen, M., Moran, J., Pallesen, J., Palmer, D.S., Pedersen,

- 1041 C.B., Pedersen, M.G., Poterba, T., Poulsen, J.B., Ripke, S., Schork, A.J., Thompson, W.K.,  
1042 Turley, P., Walters, R.K., 2020. Large-Scale Exome Sequencing Study Implicates Both  
1043 Developmental and Functional Changes in the Neurobiology of Autism. *Cell*.  
1044 <https://doi.org/10.1016/j.cell.2019.12.036>
- 1045 Schmid, S., Wilson, D.A., Rankin, C.H., 2015. Habituation mechanisms and their importance for  
1046 cognitive function. *Front. Integr. Neurosci.* 8, 97. <https://doi.org/10.3389/fnint.2014.00097>
- 1047 Serrano-Saiz, E., Leyva-Díaz, E., De La Cruz, E., Hobert, O., 2018. BRN3-type POU Homeobox  
1048 Genes Maintain the Identity of Mature Postmitotic Neurons in Nematodes and Mice. *Curr.*  
1049 *Biol.* 28, 2813-2823.e2. <https://doi.org/10.1016/j.cub.2018.06.045>
- 1050 Slevén, H., Welsh, S.J., Yu, J., Churchill, M.E.A., Wright, C.F., Henderson, A., Horvath, R.,  
1051 Rankin, J., Vogt, J., Magee, A., McConnell, V., Green, A., King, M.D., Cox, H., Armstrong,  
1052 L., Lehman, A., Nelson, T.N., Williams, J., Clouston, P., Hagman, J., Németh, A.H., 2017.  
1053 De Novo Mutations in EBF3 Cause a Neurodevelopmental Syndrome. *Am. J. Hum. Genet.*  
1054 100, 138–150. <https://doi.org/10.1016/j.ajhg.2016.11.020>
- 1055 Swierczek, N.A., Giles, A.C., Rankin, C.H., Kerr, R.A., 2011. High-throughput behavioral  
1056 analysis in *C. elegans*. *Nat. Methods* 8. <https://doi.org/10.1038/nmeth.1625>
- 1057 Sze, J.Y., Ruvkun, G., 2003. Activity of the *Caenorhabditis elegans* UNC-86 POU transcription  
1058 factor modulates olfactory sensitivity. *Proc. Natl. Acad. Sci.* 100, 9560–9565.  
1059 <https://doi.org/10.1073/pnas.1530752100>
- 1060 Tanaka, A.J., Cho, M.T., Willaert, R., Retterer, K., Zarate, Y.A., Bosanko, K., Stefans, V., Oishi,  
1061 K., Williamson, A., Wilson, G.N., Basinger, A., Barbaro-Dieber, T., Ortega, L., Sorrentino,  
1062 S., Gabriel, M.K., Anderson, I.J., Sacoto, M.J.G., Schnur, R.E., Chung, W.K., 2017. De  
1063 novo variants in EBF3 are associated with hypotonia, developmental delay, intellectual  
1064 disability, and autism. *Mol. Case Stud.* 3, a002097. <https://doi.org/10.1101/mcs.a002097>
- 1065 Thompson, R.F., Spencer, W.A., 1966. Habituation: A model phenomenon for the study of  
1066 neuronal substrates of behavior. *Psychol. Rev.* 73, 16–43.

- 1067 <https://doi.org/10.1037/h0022681>
- 1068 Timbers, T.A., Giles, A.C., Ardiel, E.L., Kerr, R.A., Rankin, C.H., 2013. Intensity discrimination  
1069 deficits cause habituation changes in middle-aged *Caenorhabditis elegans*. *Neurobiol.*  
1070 *Aging* 34, 621–631. <https://doi.org/10.1016/j.neurobiolaging.2012.03.016>
- 1071 Vissers, L.E.L.M., Gilissen, C., Veltman, J.A., 2016. Genetic studies in intellectual disability and  
1072 related disorders. *Nat. Rev. Genet.* 17, 9–18. <https://doi.org/10.1038/nrg3999>
- 1073 Vogel-Ciernia, A., Matheos, D.P., Barrett, R.M., Kramár, E.A., Azzawi, S., Chen, Y., Mangan,  
1074 C.N., Zeller, M., Sylvain, A., Haettig, J., Jia, Y., Tran, A., Dang, R., Post, R.J., Chabrier, M.,  
1075 Babayan, A.H., Wu, J.I., Crabtree, G.R., Baldi, P., Baram, T.Z., Lynch, G., Wood, M.A.,  
1076 2013. The neuron-specific chromatin regulatory subunit BAF53b is necessary for synaptic  
1077 plasticity and memory. *Nat. Neurosci.* 16, 552–561. <https://doi.org/10.1038/nn.3359>
- 1078 Wang, S., Tang, N.H., Lara-Gonzalez, P., Zhao, Z., Cheerambathur, D.K., Prevo, B., Chisholm,  
1079 A.D., Desai, A., Oegema, K., 2017. A toolkit for GFP-mediated tissue-specific protein  
1080 degradation in *C. elegans*. *Development* 144, 2694–2701.  
1081 <https://doi.org/10.1242/dev.150094>
- 1082 Wickham, H., 2016. *ggplot2: Elegant Graphics for Data Analysis*. Springer-Verlag, New York.
- 1083 Willemsen, M.H., Nijhof, B., Fenckova, M., Nillesen, W.M., Bongers, E.M.H.F., Castells-Nobau,  
1084 A., Asztalos, L., Viragh, E., van Bon, B.W.M., Tezel, E., Veltman, J.A., Brunner, H.G., de  
1085 Vries, B.B.A., de Ligt, J., Yntema, H.G., van Bokhoven, H., Isidor, B., Le Caignec, C.,  
1086 Lorino, E., Asztalos, Z., Koolen, D.A., Vissers, L.E.L.M., Schenck, A., Kleefstra, T., 2013.  
1087 &em&GATAD2B&lt;/em&gt; loss-of-function mutations cause a recognisable syndrome  
1088 with intellectual disability and are associated with learning deficits and synaptic  
1089 undergrowth in &em&Drosophila&lt;/em&gt; *J. Med. Genet.* 50, 507 LP – 514.  
1090 <https://doi.org/10.1136/jmedgenet-2012-101490>
- 1091 Williams, L.E., Blackford, J.U., Luksik, A., Gauthier, I., Heckers, S., 2013. Reduced habituation  
1092 in patients with schizophrenia. *Schizophr. Res.* 151, 124–132.

- 1093 <https://doi.org/10.1016/j.schres.2013.10.017>
- 1094 Willsey, A.J., Sanders, S.J., Li, M., Dong, S., Tebbenkamp, A.T., Muhle, R.A., Reilly, S.K., Lin,  
1095 L., Fertuzinhos, S., Miller, J.A., Murtha, M.T., Bichsel, C., Niu, W., Cotney, J., Ercan-  
1096 Sencicek, A.G., Gockley, J., Gupta, A.R., Han, W., He, X., Hoffman, E.J., Klei, L., Lei, J.,  
1097 Liu, W., Liu, L., Lu, C., Xu, X., Zhu, Y., Mane, S.M., Lein, E.S., Wei, L., Noonan, J.P.,  
1098 Roeder, K., Devlin, B., Sestan, N., State, M.W., 2013. Coexpression Networks Implicate  
1099 Human Midfetal Deep Cortical Projection Neurons in the Pathogenesis of Autism. *Cell* 155,  
1100 997–1007. <https://doi.org/10.1016/j.cell.2013.10.020>
- 1101 Xiang, M., Zhou, L., Macke, J.P., Yoshioka, T., Hendry, S.H., Eddy, R.L., Shows, T.B., Nathans,  
1102 J., 1995. The Brn-3 family of POU-domain factors: primary structure, binding specificity,  
1103 and expression in subsets of retinal ganglion cells and somatosensory neurons. *J.*  
1104 *Neurosci.* 15, 4762–85.
- 1105 Zeier, Z., Kumar, A., Bodhinathan, K., Feller, J.A., Foster, T.C., Bloom, D.C., 2009. Fragile X  
1106 mental retardation protein replacement restores hippocampal synaptic function in a mouse  
1107 model of fragile X syndrome. *Gene Ther.* 16, 1122–1129.  
1108 <https://doi.org/10.1038/gt.2009.83>
- 1109 Zhang, L., Ward, J.D., Cheng, Z., Dernburg, A.F., 2015. The auxin-inducible degradation (AID)  
1110 system enables versatile conditional protein depletion in *C. elegans*. *Development* 142,  
1111 4374–4384. <https://doi.org/10.1242/dev.129635>
- 1112 Zou, M., Li, S., Klein, W.H., Xiang, M., 2012. Brn3a/Pou4f1 regulates dorsal root ganglion  
1113 sensory neuron specification and axonal projection into the spinal cord. *Dev. Biol.* 364,  
1114 114–127. <https://doi.org/10.1016/j.ydbio.2012.01.021>
- 1115
